# Supplementary material
Source: MDPI journal article supplement (https://www.mdpi.com/1424-8247/15/9/1125)

## Supplementary Material

### Synthesis and structure-activity relationships for the anti-mycobacterial activity of 3-phenyl-*N*-(pyridin-2-ylmethyl)pyrazolo[1,5-*a*]pyrimidin-7-amines

Hamish S. Sutherland <sup>a, b</sup>, Peter J. Choi <sup>a, b\*</sup>, Guo-Liang Lu <sup>a, b</sup>, Anna C. Giddens <sup>a</sup>, Amy S.T. Tong <sup>a</sup>, Scott G. Franzblau <sup>c</sup>, Christopher B. Cooper <sup>d</sup>, Brian D. Palmer <sup>a, b</sup>, William A. Denny <sup>a, b</sup>

<sup>a</sup> Auckland Cancer Society Research Centre, School of Medical Sciences, University of Auckland, Private Bag 92019, Auckland, 1142, New Zealand

<sup>b</sup> Maurice Wilkins Centre, University of Auckland, Auckland, 1142, New Zealand

<sup>c</sup> Institute for Tuberculosis Research, College of Pharmacy, University of Illinois at Chicago, 833 South Wood Street, Chicago, IL, 60612, USA

<sup>d</sup> Global Alliance for TB Drug Development, 40 Wall St, New York, 10005, USA

\* Corresponding author. Auckland Cancer Society Research Centre, School of Medical Sciences, University of Auckland, New Zealand.

E-mail address: p.choi@auckland.ac.nz

## **CONTENTS**

|                                                                          |      |
|--------------------------------------------------------------------------|------|
| General Procedure and experimental                                       | 2    |
| <sup>1</sup> H Spectra for compounds that progressed to advanced testing | 3-24 |

### ***General information***

Final products were analysed by reverse-phase HPLC (Alltima C18 5  $\mu$ m column, 15  $\times$  3.2 mm; Alltech Associated, Inc., Deerfield, IL) using an Agilent HP1100 equipped with a diode-array detector. It was run using mobile phases with 80% CH<sub>3</sub>CN/20% H<sub>2</sub>O (v/v) in 45 mM NH<sub>4</sub>HCO<sub>2</sub> at pH 3.5 and 0.5 mL/min. Purity level was determined by monitoring at 330  $\pm$  50 nm and was  $\geq$ 95% for all final products. NMR spectra were obtained on a Bruker Avance 400 spectrometer at 400 MHz for <sup>1</sup>H and <sup>13</sup>C. Low-resolution mass spectra (LRMS), using atmospheric pressure chemical ionization (APCI) were measured on a ThermoFinnigan Surveyor MSQ mass spectrometer, connected to a Gilson autosampler. High resolution mass spectra (HRMS) were obtained using an Agilent G6530B Q-TOF spectrometer and are reported as M+H. Melting points were determined on an Electrothermal 9100 melting point apparatus.

# <sup>1</sup>H NMR and <sup>13</sup>C NMR Spectra for compounds that progressed to advanced testing

## Compound 18

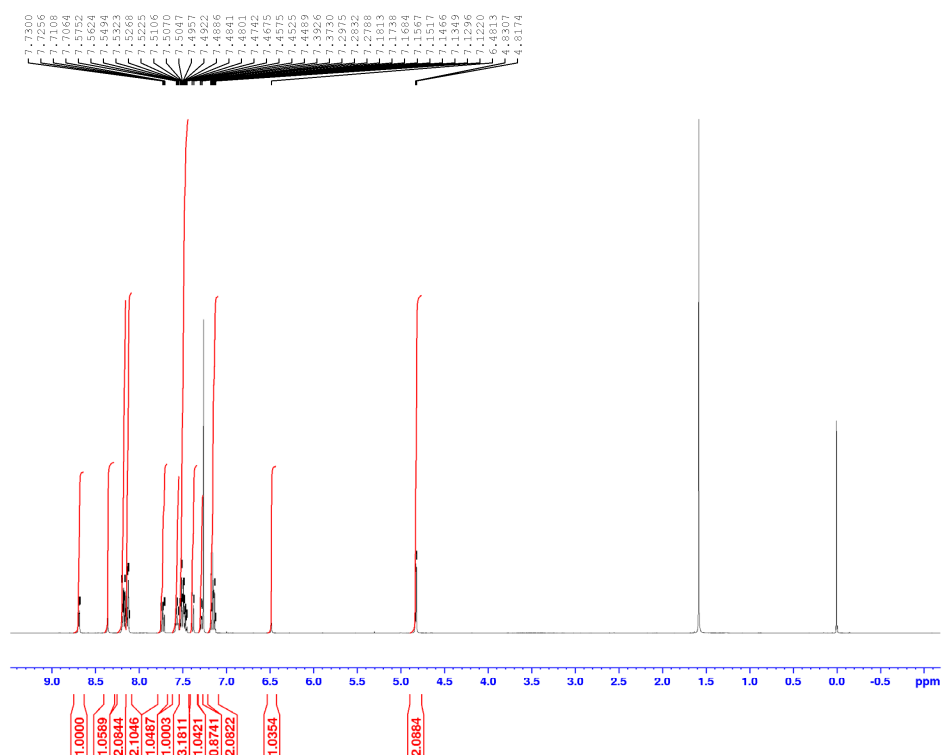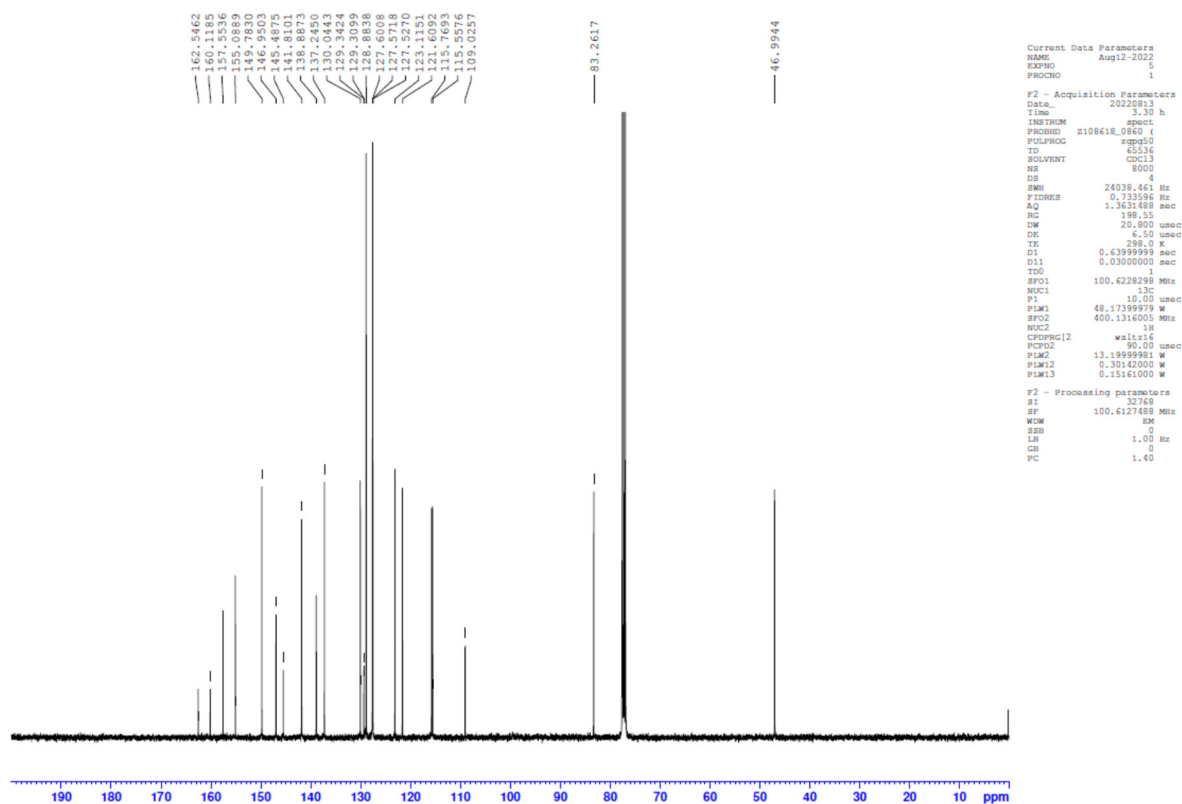

[illegible]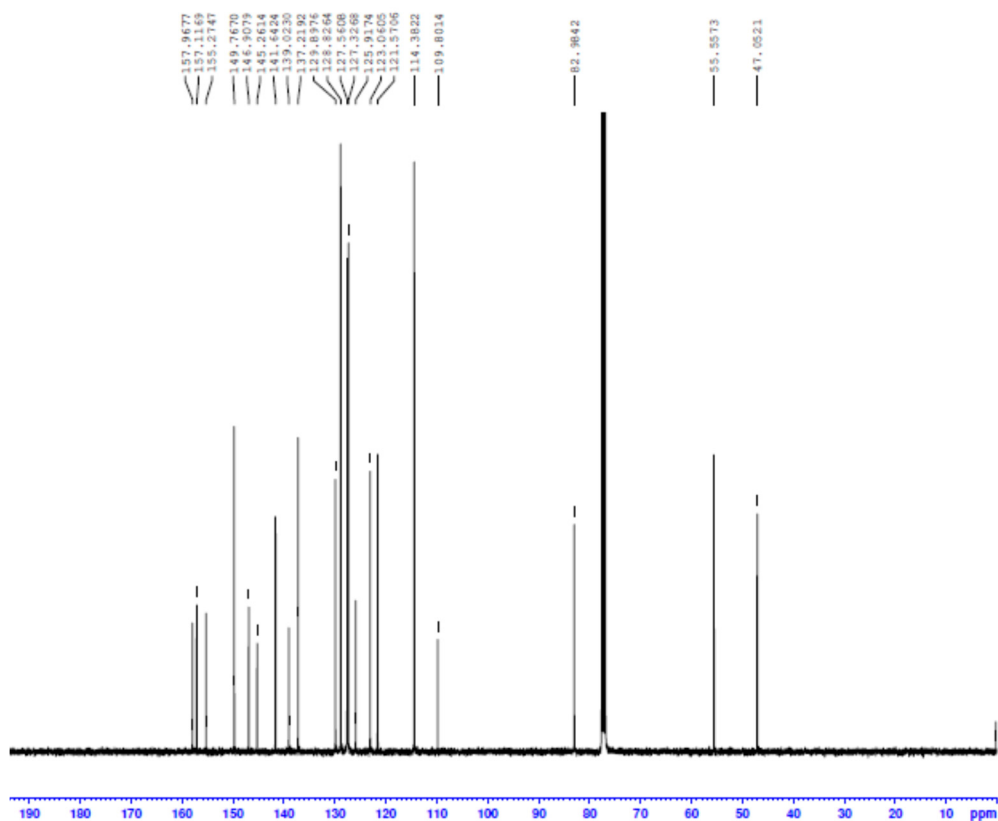

# Compound 25

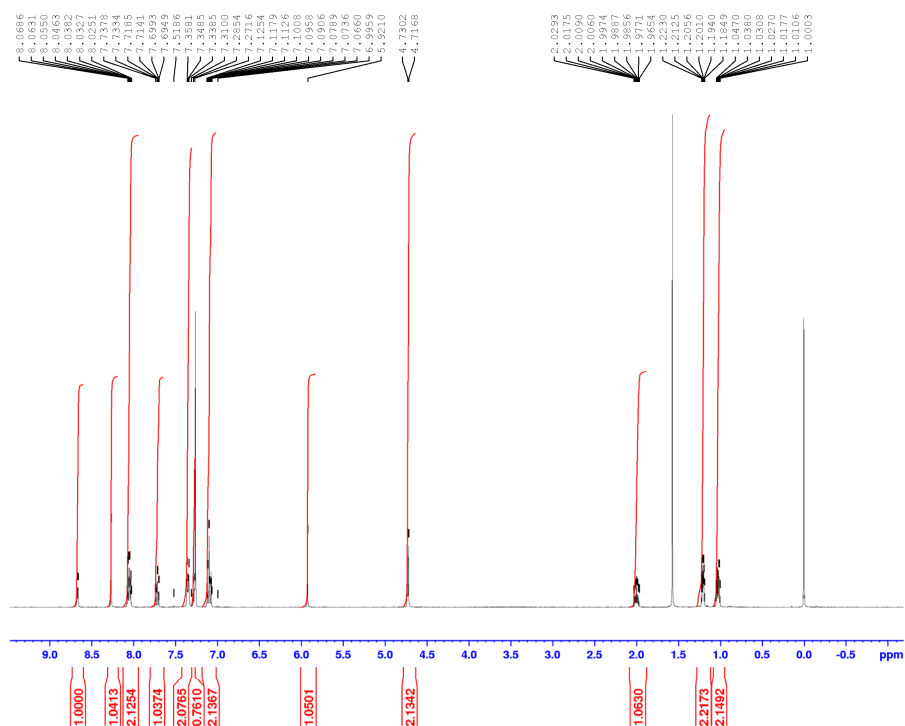

Current Data Parameters  
 NAME Jul18-2017  
 EXPNO 9  
 PROCNO 1

F2 - Acquisition Parameters  
 Date\_ 20170705  
 Time 10.48 h  
 INSTRUM spect  
 PROBHD 2108618\_0960 (1  
 PULPROG zgpg30  
 TD 65536  
 SOLVENT CDCl3  
 NS 64  
 DS 2  
 SWH 8012.820 Hz  
 FIDRES 0.244532 Hz  
 AQ 4.0894465 sec  
 RG 198.50  
 DW 62.400 usec  
 DE 4.10 usec  
 TE 298.0 K  
 D1 1.00000000 sec  
 TDS 1  
 SFO1 400.1324708 MHz  
 NUC1 1H  
 P1 13.60 usec  
 PLW1 13.1999991 W

F2 - Processing parameters  
 SI 65536  
 SF 400.1300094 MHz  
 WDW EM  
 LB 0  
 GB 0.30 Hz  
 CB 0  
 PC 1.00

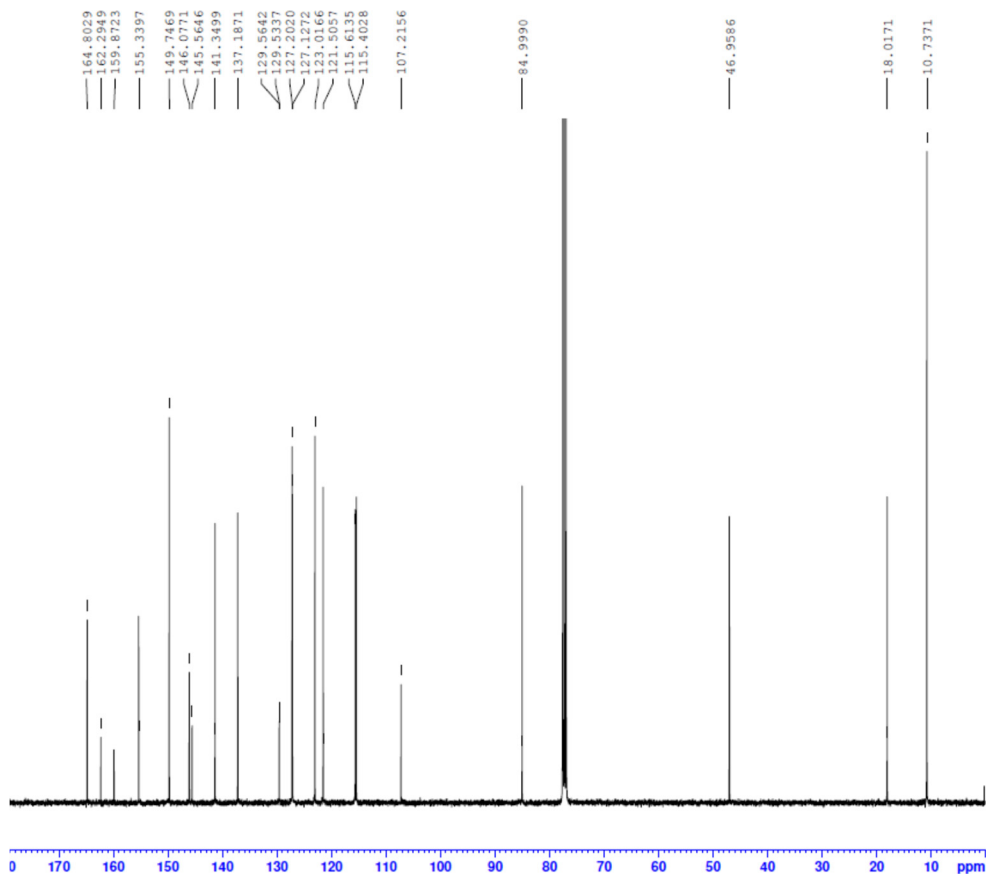

Current Data Parameters  
 NAME Aug12-2022  
 EXPNO 19  
 PROCNO 1

F2 - Acquisition Parameters  
 Date\_ 20220814  
 Time 13.56 h  
 INSTRUM spect  
 PROBHD 2108618\_0960 (1  
 PULPROG zgpg30  
 TD 65536  
 SOLVENT CDCl3  
 NS 7000  
 DS 4  
 SWH 24038.461 Hz  
 FIDRES 0.733596 Hz  
 AQ 1.3631688 sec  
 RG 198.55  
 DW 20.800 usec  
 DE 6.50 usec  
 TE 298.0 K  
 D1 0.63999999 sec  
 D11 0.03000000 sec  
 TDS 1  
 SFO1 100.6228298 MHz  
 NUC1 13C  
 P1 10.00 usec  
 PLW1 48.17399979 W  
 SFO2 400.1316005 MHz  
 NUC2 1H  
 CPDPRG2 waltz16  
 PCPD2 90.00 usec  
 PLW2 13.19999901 W  
 PLW12 0.30142000 W  
 PLW13 0.15161000 W

F2 - Processing parameters  
 SI 32768  
 SF 100.6127482 MHz  
 WDW EM  
 LB 1.00 Hz  
 GB 0  
 CB 0  
 PC 1.40

<sup>1</sup>H NMR spectrum (CDCl<sub>3</sub>) of compound 10. The x-axis represents the chemical shift in ppm, ranging from 0.0 to 9.0. The spectrum shows several sharp singlet peaks. Integration values are indicated below the baseline. The chemical shifts (δ) are listed on the right side of the spectrum.

Chemical shifts (δ): 8.3079, 8.1459, 8.1404, 8.1383, 8.1322, 8.1252, 8.1155, 8.1099, 7.7831, 7.7199, 7.7155, 7.7007, 7.6922, 7.4022, 7.3891, 7.3692, 7.3650, 7.3583, 7.3528, 7.2728, 7.1346, 7.1121, 7.1073, 7.0956, 6.9762, 6.9704, 6.6640, 6.6591, 6.6542, 6.1707, 4.7548, 4.7416, 2.9289, 2.9233, 2.9171, 2.9117, 2.9042, 2.8996, 2.8953, 2.8900, 2.8844, 2.6411, 2.6349, 2.6288, 2.6238, 2.6167, 2.6108, 2.5994, 2.5943, 2.5513, 2.5811, 2.1042, 2.0980, 2.0933, 2.0833, 2.0462, 2.0278, 1.9586, 0.8818, 0.8643.

Integration values (from left to right): 1.0000, 1.0362, 2.1165, 1.0383, 2.0669, 1.0173, 2.1319, 1.0377, 1.0471, 2.1382, 2.1247, 2.1486, 2.1276, 0.2289, 0.1083.

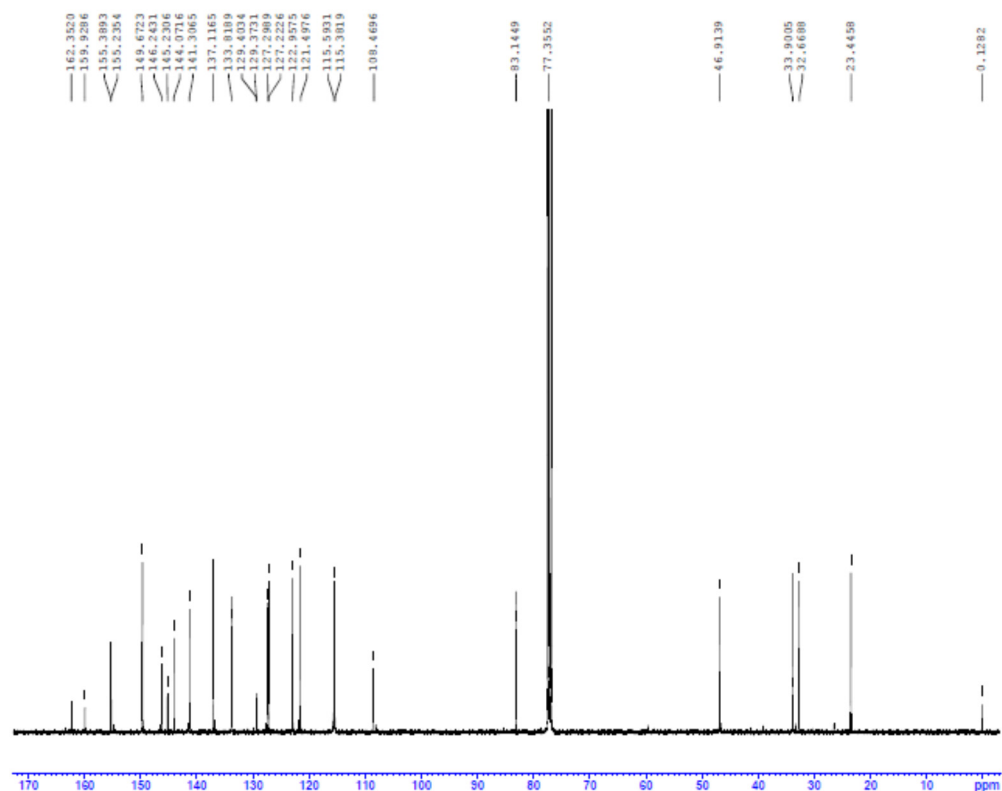

```

Current Data Parameters
NAME      Ju06-2017
EXPNO     1
PROCNO    1

F2 - Acquisition Parameters
Date_     20170705
Time      14:56:36
INSTRUM    spect
FREQID     1000010002
PULPROG    zgpg30
TD          65536
SOLVENT    CDCl3
NS          64
DS          2
SWH          8012.820 Hz
FIDRES     0.244532 Hz
AQ          4.088930 sec
RG          198.155
SWH         26.460 sec
AQ          6.450 sec
TE          299.2
DE          1.0000000 sec
T2*         290.0
F201       400.132470 MHz
NUC1        1H
P1          12.000 sec
PL1         13.19999991 W
F2 - Processing parameters
SI          65536
SF          400.132470 MHz
WDW          EM
SSB          0.30 Hz
GB          0
BR          1.60
GB          0

```

```

0.128
Current Data Parameters
      Date:      Aug/20/2002
      MODE      1
      EXPNO     1

FT - Acquisition Parameters
      Date_     20020821
      Time      12:23:23
      INSTRUM   spect
      PROCNO    21080109
      PULPROG   zgpg30
      SOLVENT    CDCl3
      NS         10000
      DS         4
      SWH         24030.461 MHz
      FIDRES     0.7335568 MHz
      AQ          1.3433333 sec
      RG          680
      SWH_MZ     1.0000000 MHz
      ZF          400.1313500 MHz
      DE         1.0000000
      TE          300.2
      D1          0.23000000 sec
      D11         0.02000000 sec
      TDEL        0.0000000
      SFO         100.6220920 MHz
      MZC1        0
      MZC2        10.0000000 MHz
      MZC3        48.77399974 MHz
      MZC4        400.1313500 MHz
      MZC5        0
      MZC6        1.0000000 MHz
      CPDPRG02   waltz16
      PCPD02     0.00.00000
      PCPD03     13.19499980 MHz
      PCPD04     0.20010000 MHz
      PCPD05     0.12510000 MHz

FT - Processing Parameters
      AT          32768
      EN         100.6120000 MHz
      SI          32768
      SF          400.1313500 MHz
      DS          4
      SWH          1.0000000 MHz
      FIDRES       1.0000000 MHz
      PC          1.400

```

# Compound 27

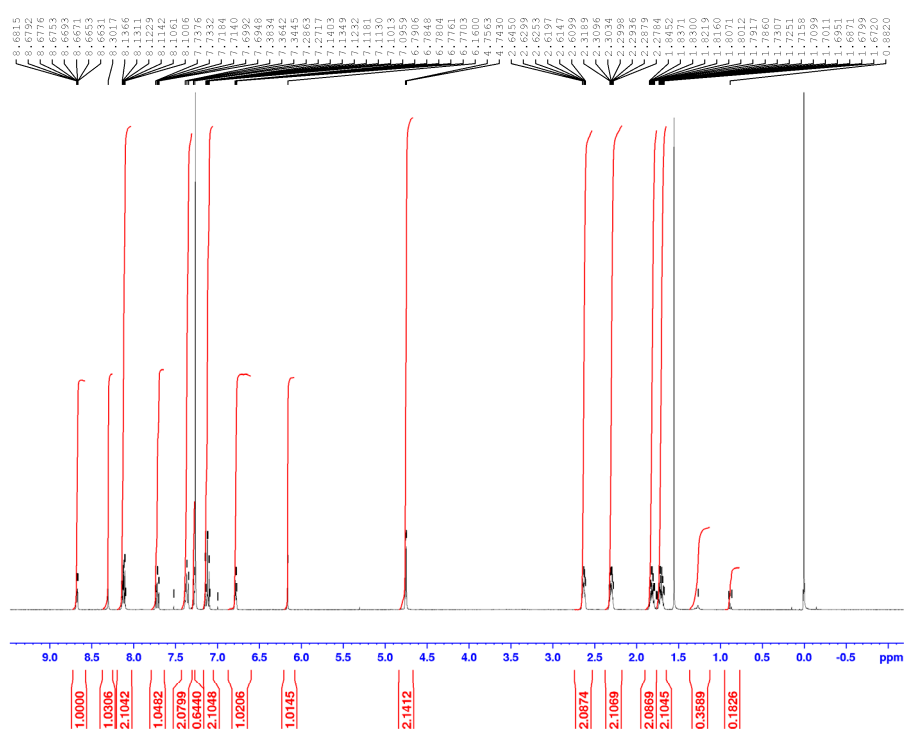

Current Data Parameters  
 NAME: 20170713  
 EXPNO: 3  
 PROCNO: 1  
 F2 - Acquisition Parameters  
 Date\_: 20170713  
 Time: 11.41 h  
 INSTRUM: spect  
 PROBRD: z108618\_0860  
 PULPROG: zgpg50  
 TO: 85536  
 SOLVENT: CDCl3  
 NS: 64  
 DS: 2  
 SWH: 8012.822 Hz  
 FIDRES: 0.244532 Hz  
 AQ: 4.0894465 sec  
 RG: 199.55  
 DW: 62.400 usec  
 DE: 6.50 usec  
 TE: 298.0 K  
 D1: 1.00000000 sec  
 TD0: 1  
 SFO1: 400.1324708 MHz  
 NUC1: 13C  
 P1: 13.60 usec  
 PLW1: 13.19999981 W  
 F2 - Processing parameters  
 SI: 45536  
 SF: 400.1300000 MHz  
 WDW: EM  
 SSB: 0  
 LB: 0.30 Hz  
 GB: 0  
 PC: 1.00

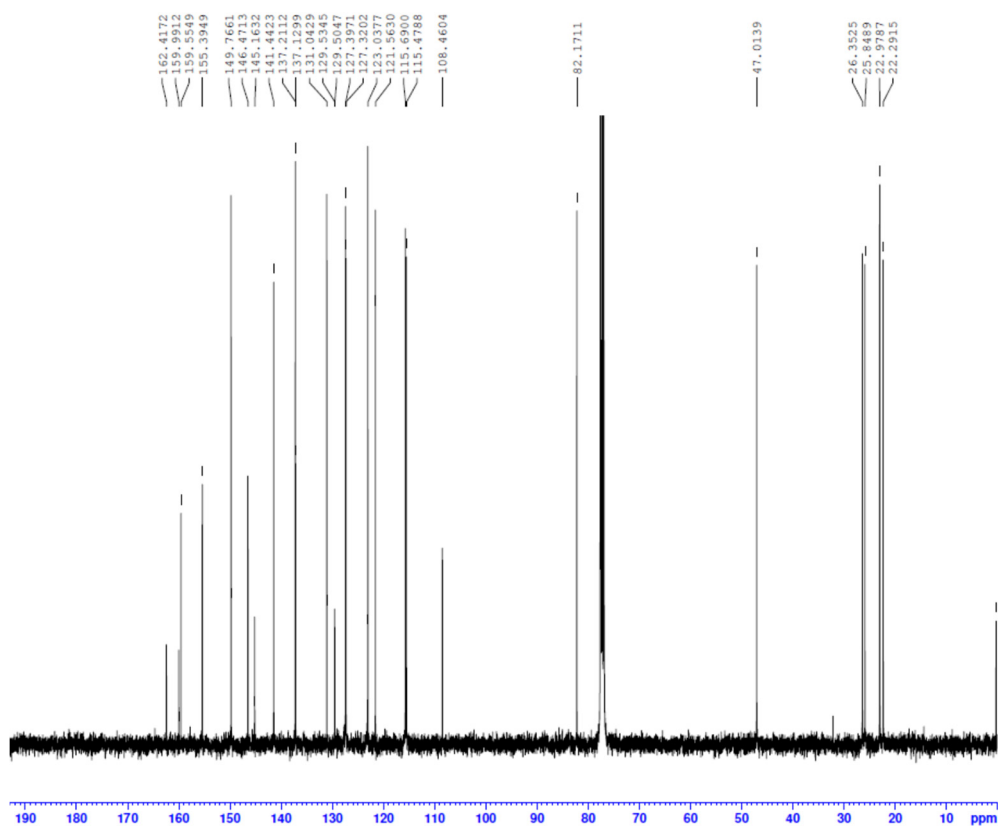

Current Data Parameters  
 NAME: Aug12-2022  
 EXPNO: 15  
 PROCNO: 1  
 F2 - Acquisition Parameters  
 Date\_: 20220815  
 Time: 10.30 h  
 INSTRUM: spect  
 PROBRD: z108618\_0860  
 PULPROG: zgpg50  
 TO: 85536  
 SOLVENT: CDCl3  
 NS: 16000  
 DS: 4  
 SWH: 24038.461 Hz  
 FIDRES: 0.733584 Hz  
 AQ: 1.3631488 sec  
 RG: 198.55  
 DW: 20.800 usec  
 DE: 6.50 usec  
 TE: 298.0 K  
 D1: 0.639999999 sec  
 D11: 0.030000000 sec  
 TD0: 1  
 SFO1: 100.6228298 MHz  
 NUC1: 13C  
 P1: 10.00 usec  
 PLW1: 48.17399979 W  
 SFO2: 400.1314005 MHz  
 NUC2: 1H  
 CPOW2: wait16  
 PCPD2: 90.00 usec  
 PLW2: 13.19999981 W  
 PLW12: 0.3012000 W  
 PLW13: 0.15161000 W  
 F2 - Processing parameters  
 SI: 26768  
 SF: 100.6127479 MHz  
 WDW: EM  
 SSB: 0  
 LB: 1.00 Hz  
 GB: 0  
 PC: 1.40

# Compound 28

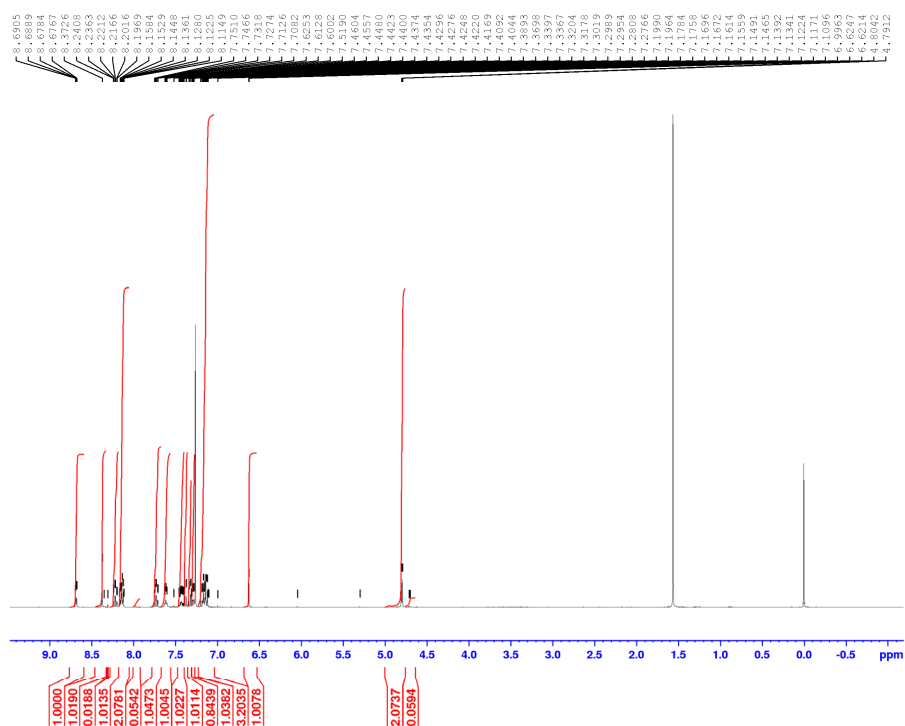

Current Data Parameters  
NAME Jun28-2017  
EXPNO 10  
PROCNO 1

F2 - Acquisition Parameters  
Date\_ 20170528  
Time 16.15 h  
INSTRUM spect  
PROBHD 2108618\_0950 (1  
PULPROG zgpg30  
FIDRES 0.250  
TD 65536  
SOLVENT CDCl3  
NS 64  
DS 2  
SWH 8012.820 Hz  
FIDRES 0.244332 Hz  
AQ 4.0894465 sec  
RG 198.50  
DW 62.400 usec  
DE 4.10 usec  
TE 298.2 K  
TDS 1.00000000 sec  
SFO1 400.1324708 MHz  
NUC1 1H  
P1 13.60 usec  
PL1 13.1999991 W

F2 - Processing parameters  
SI 65536  
SF 400.1300093 MHz  
WDW EM  
SSB 0  
GB 0.30 Hz  
DB 8  
PC 1.00

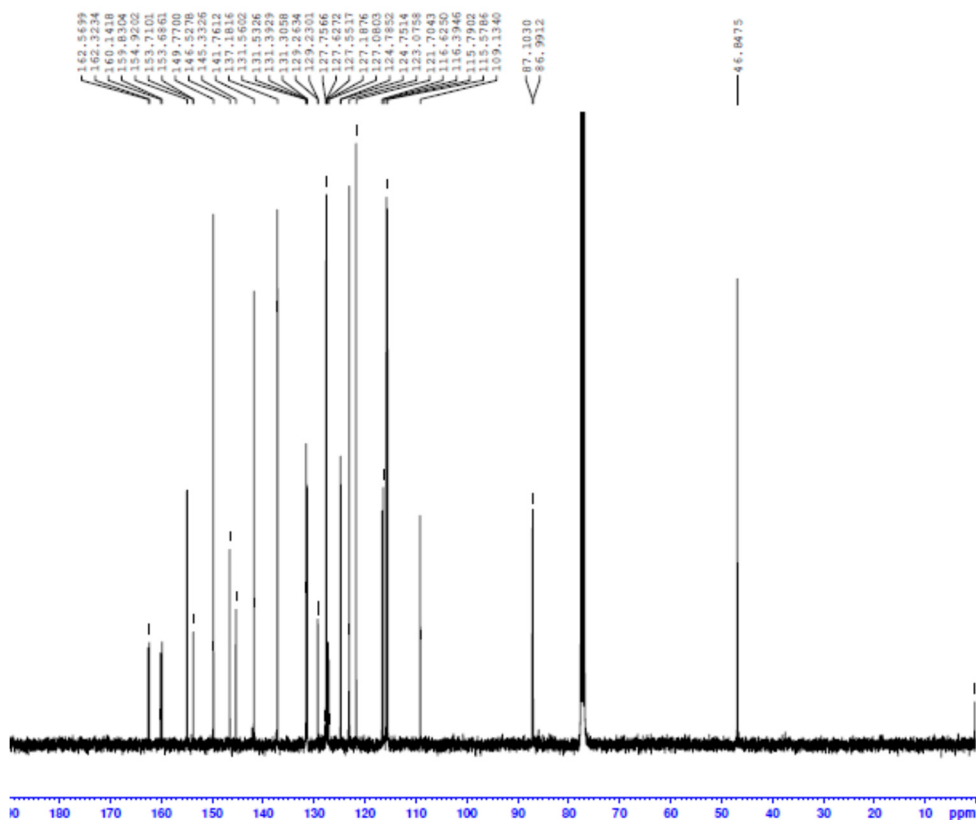

Current Data Parameters  
NAME Aug12-2022  
EXPNO 15  
PROCNO 1

F2 - Acquisition Parameters  
Date\_ 20220814  
Time 5.00 h  
INSTRUM spect  
PROBHD 2108618\_0950 (1  
PULPROG zgpg30  
FIDRES 0.250  
TD 65536  
SOLVENT CDCl3  
NS 6400  
DS 4  
SWH 24038.461 Hz  
FIDRES 0.733598 Hz  
AQ 1.3611488 sec  
RG 198.50  
DW 20.800 usec  
DE 6.50 usec  
TE 298.2 K  
TDS 0.61999999 sec  
SFO1 100.6228239 MHz  
NUC1 13C  
P1 10.00 usec  
PL1 48.17339977 W  
SFO2 400.1316005 MHz  
NUC2 1H  
PCPD2 90.00 usec  
PL2 13.19999981 W  
SFO3 0.30142000 W  
PL3 0.15161000 W

F2 - Processing parameters  
SI 32768  
SF 100.6127486 MHz  
WDW EM  
SSB 0  
GB 1.00 Hz  
DB 8  
PC 1.40



# Compound 30

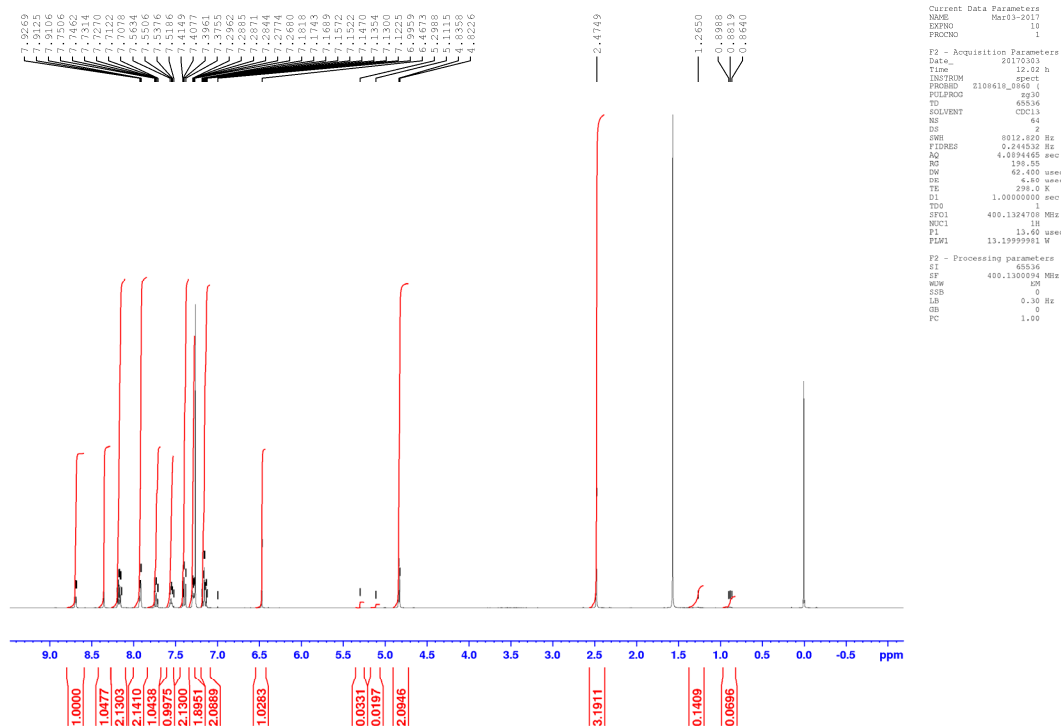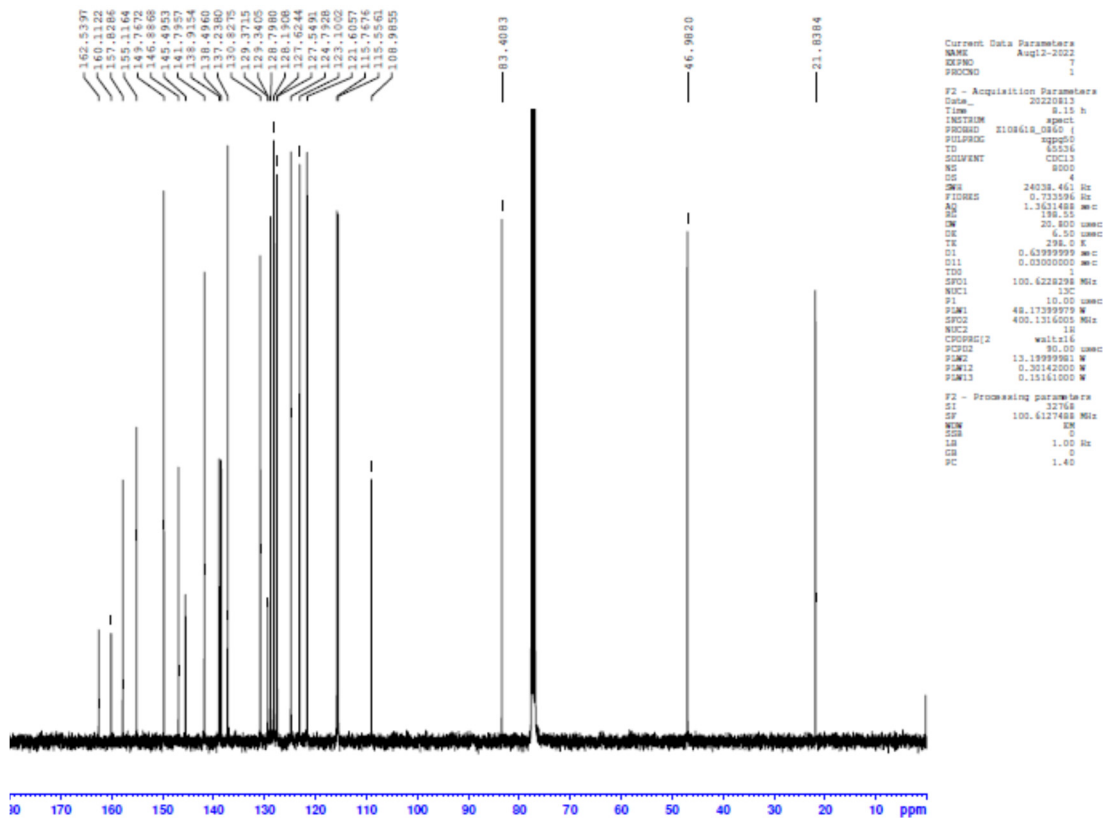

# Compound 34

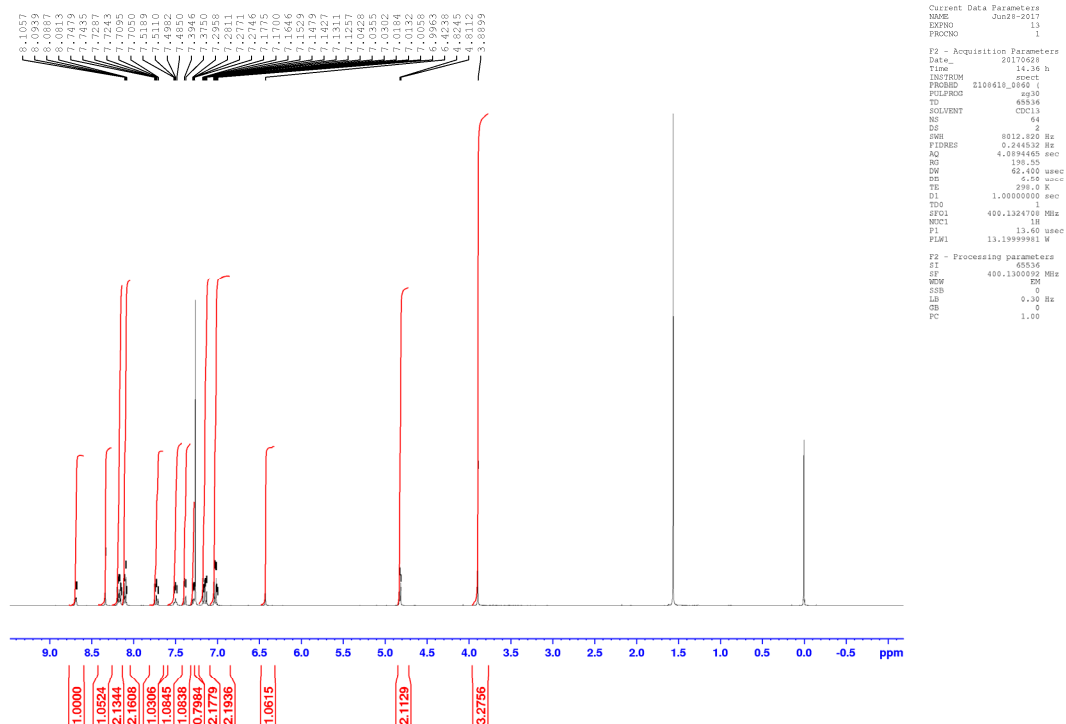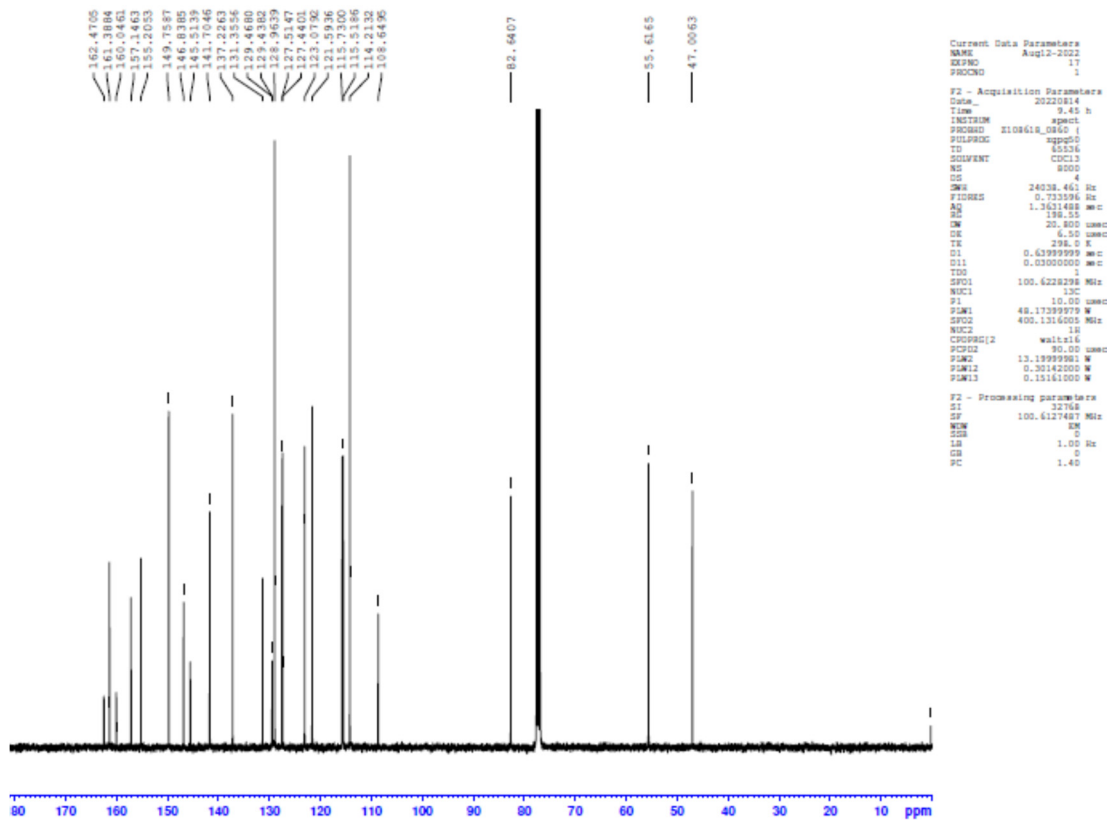

# Compound 35

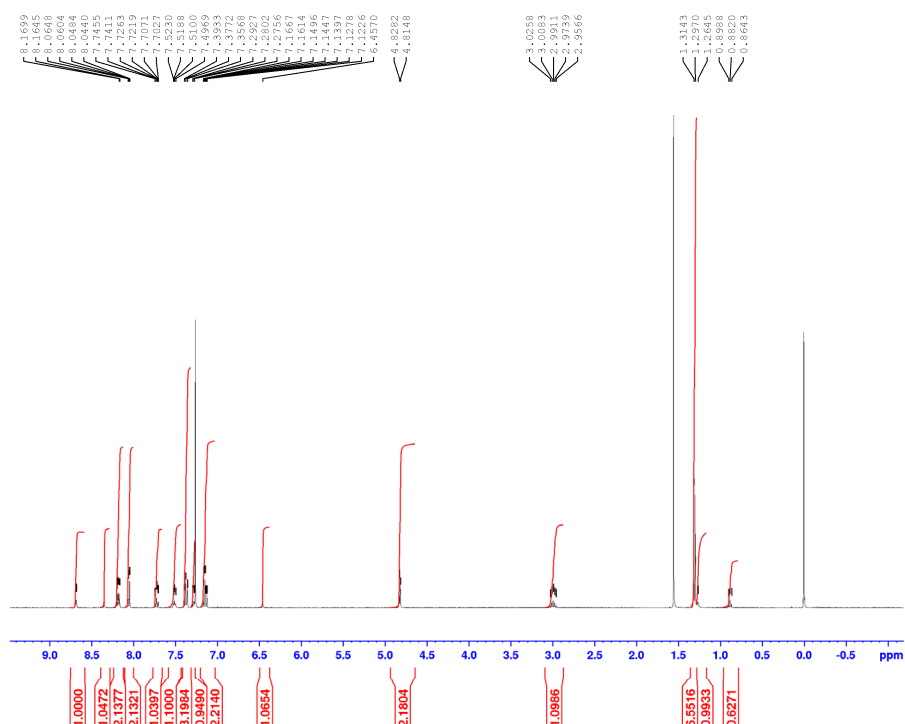

Current Data Parameters  
 NAME Jul15-2017  
 EXPNO 12  
 PROCNO 1

F2 - Acquisition Parameters  
 Date\_ 20170705  
 Time 11:14 h  
 INSTRUM spect  
 PRBHD 2108618.0860 (mm)  
 PULPROG zgpg30  
 TD 65536  
 SFO1 400.1324708 MHz  
 SOLVENT CDCl3  
 NS 64  
 DS 4  
 FWH 8012.620 Hz  
 FIDRES 0.244532 Hz  
 AQ 4.898465 sec  
 RG 198.55  
 DW 60.400 usec  
 DE 9.70 usec  
 TE 298.0 K  
 D1 1.00000000 sec  
 TDS 1  
 SFO1 400.1324708 MHz  
 NUC1 1H  
 P1 13.40 usec  
 PL1 13.19999981 W  
 PL11 13.19999981 W

F2 - Processing parameters  
 SI 65536  
 SF 400.1300094 MHz  
 WDW DM  
 SSB 0  
 LB 0.30 Hz  
 GB 0  
 PC 1.40

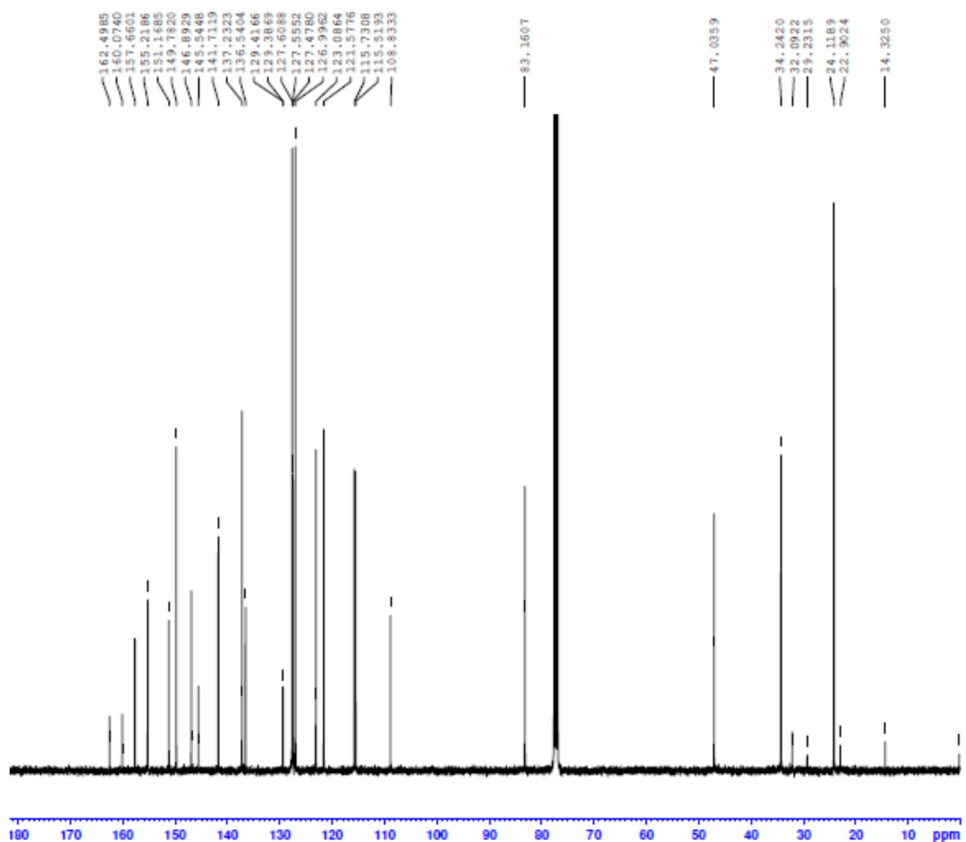

Current Data Parameters  
 NAME Aug12-2022  
 EXPNO 23  
 PROCNO 1

F2 - Acquisition Parameters  
 Date\_ 20220815  
 Time 1:09 h  
 INSTRUM spect  
 PRBHD 2108618.0860 (mm)  
 PULPROG zgpg30  
 TD 65536  
 SFO1 100.6228298 MHz  
 SOLVENT CDCl3  
 NS 8000  
 DS 4  
 FWH 24038.461 Hz  
 FIDRES 0.733596 Hz  
 AQ 1.1621468 sec  
 RG 198.55  
 DW 20.800 usec  
 DE 6.50 usec  
 TE 298.0 K  
 D1 0.63999999 sec  
 D11 0.03000000 sec  
 TDS 1  
 SFO1 100.6228298 MHz  
 NUC1 13C  
 P1 18.00 usec  
 PL1 48.17399979 W  
 SFO2 400.1316005 MHz  
 NUC2 1H  
 PCP2PG2 wait16  
 SFO2 400.1316005 MHz  
 PL12 13.19999981 W  
 PL13 0.30142000 W  
 PL13 0.10161000 W

F2 - Processing parameters  
 SI 65536  
 SF 100.6127468 MHz  
 WDW EM  
 SSB 0  
 LB 1.00 Hz  
 GB 0  
 PC 1.40

# Compound 36

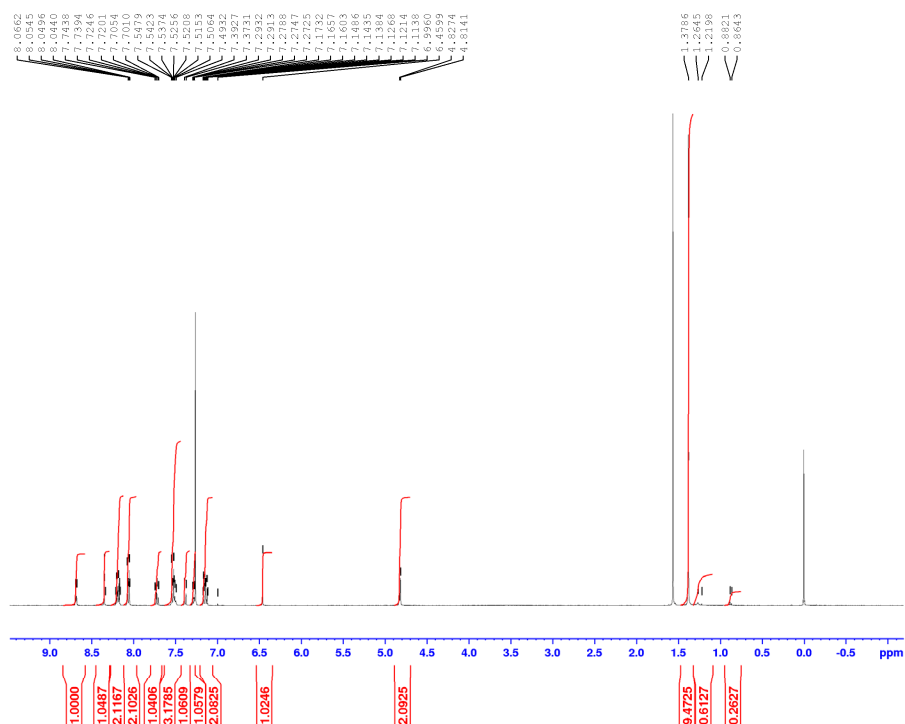

Current Data Parameters  
 NAME Jun28-2017  
 EXPNO 8  
 PROCNO 1

F2 - Acquisition Parameters  
 Date\_ 20170809  
 Time 13.53 h  
 INSTRUM spect  
 PROBRD 2100618\_0860 (i  
 PULPROG zgpg30  
 TD 65536  
 SOLVENT CDCl3  
 NS 64  
 DS 2  
 SWH 8012.820 Hz  
 FIDRES 0.244830 Hz  
 AQ 4.0894465 sec  
 RG 180.30  
 DW 62.100 usec  
 DE 1.50 usec  
 TE 298.0 K  
 D1 1.00000000 sec  
 TDS 1  
 SFO1 400.1324708 MHz  
 NUC1 1H  
 P1 13.60 usec  
 PL1 13.1999991 W

F2 - Processing parameters  
 SI 65536  
 SF 400.1300994 MHz  
 WDW EM  
 SS 0  
 LB 0.30 Hz  
 GB 0  
 PC 1.00

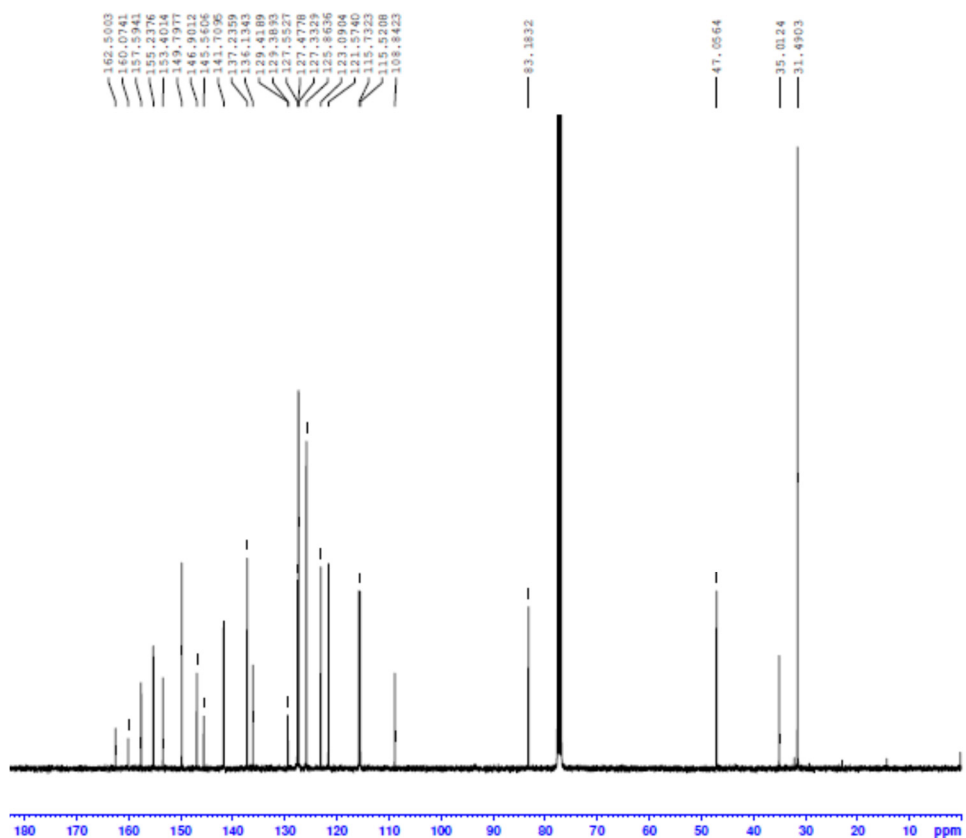

Current Data Parameters  
 NAME Aug12-2022  
 EXPNO 11  
 PROCNO 1

F2 - Acquisition Parameters  
 Date\_ 20220813  
 Time 18.55 h  
 INSTRUM spect  
 PROBRD 2100618\_0860 (i  
 PULPROG zgpg30  
 TD 65536  
 SOLVENT CDCl3  
 NS 8000  
 DS 4  
 SWH 24038.461 Hz  
 FIDRES 0.733596 Hz  
 AQ 1.3631488 sec  
 RG 180.35  
 DW 20.800 usec  
 DE 6.30 usec  
 TE 298.0 K  
 D1 0.63999999 sec  
 D11 0.030000000 sec  
 TDS 1  
 SFO1 100.6228798 MHz  
 NUC1 13C  
 P1 10.00 usec  
 PL1 48.1739979 W  
 SFO2 400.1316005 MHz  
 NUC2 1H  
 CPDPRG2 waltz16  
 PCPD2 90.00 usec  
 PL12 13.19999981 W  
 PL13 0.30142000 W  
 PL13 0.15161000 W

F2 - Processing parameters  
 SI 32768  
 SF 100.6127425 MHz  
 WDW EM  
 SS 0  
 LB 1.00 Hz  
 GB 0  
 PC 1.40

# Compound 38

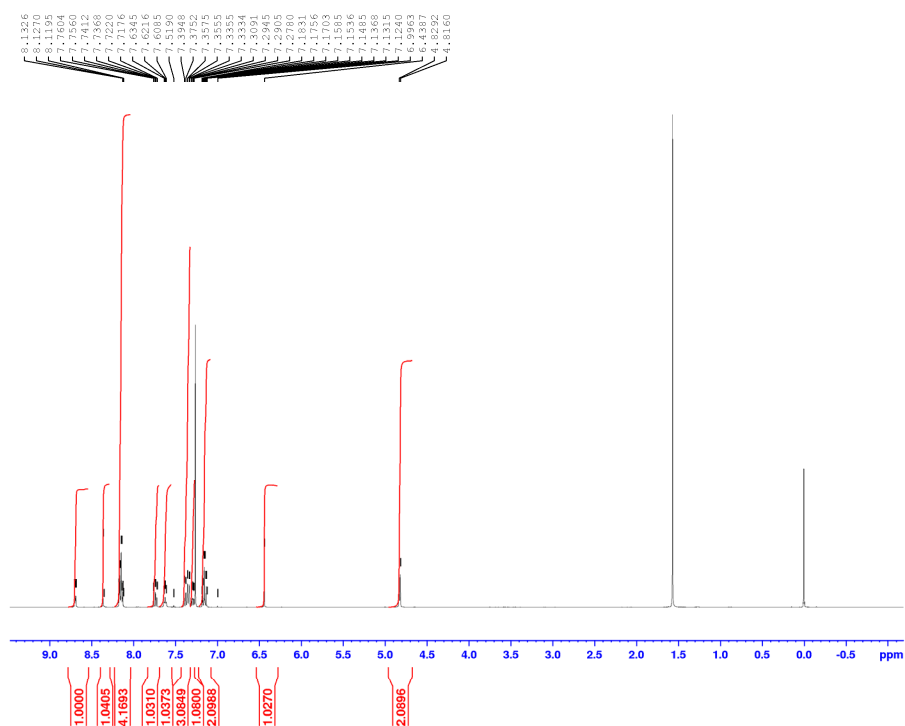

Current Data Parameters  
 NAME Jun29-2017  
 EXPNO 3  
 PROCNO 1

F2 - Acquisition Parameters  
 Date\_ 20170529  
 Time 10:36 h  
 INSTRUM spect  
 PROBRD 2108618\_0860 (1  
 PULPROG zgpg30  
 TD 65536  
 SOLVENT CDCl3  
 NS 64  
 DS 2  
 SWH 8012.820 Hz  
 FIDRES 0.244532 Hz  
 AQ 4.0894465 sec  
 RG 198.50  
 DW 62.400 usec  
 DE 4.10 usec  
 TE 298.2 K  
 D1 1.00000000 sec  
 TDS 1  
 SFO1 400.1324708 MHz  
 NUC1 1H  
 P1 13.60 usec  
 PL1 13.1999991 W

F2 - Processing parameters  
 SI 65536  
 SF 400.1300093 MHz  
 WDW EM  
 SS 0  
 LB 0.30 Hz  
 GB 0  
 PC 1.00

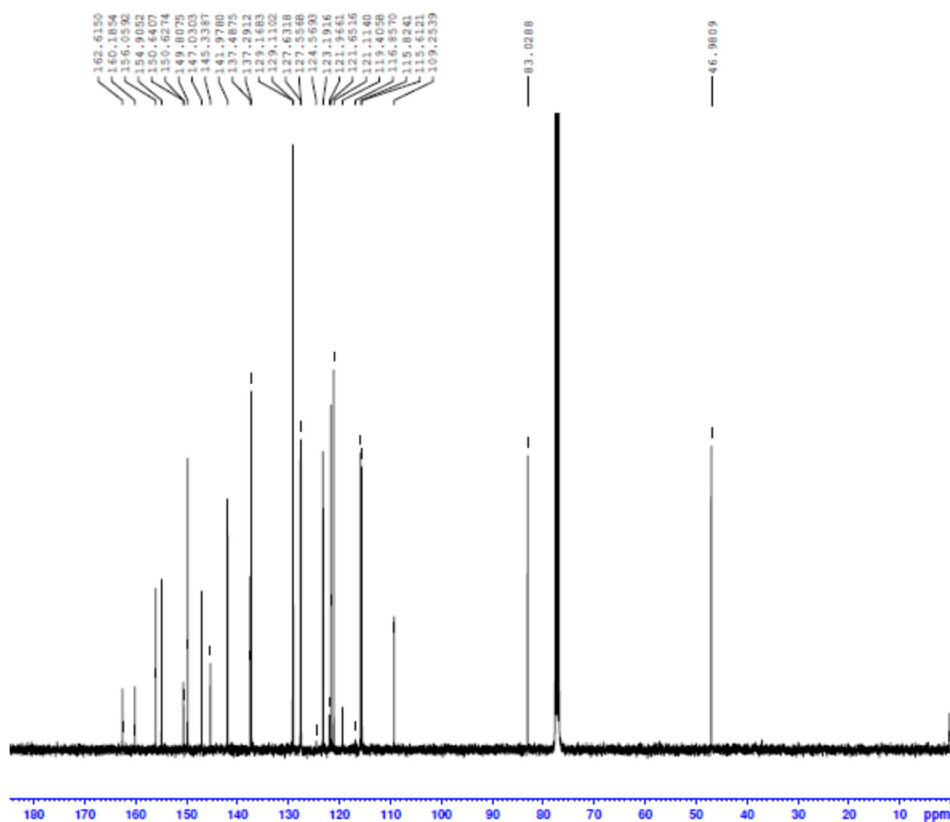

Current Data Parameters  
 NAME Aug12-2022  
 EXPNO 13  
 PROCNO 1

F2 - Acquisition Parameters  
 Date\_ 20220814  
 Time 0:14 h  
 INSTRUM spect  
 PROBRD 2108618\_0860 (1  
 PULPROG zgpg30  
 TD 65536  
 SOLVENT CDCl3  
 NS 9500  
 DS 4  
 SWH 24038.461 Hz  
 FIDRES 0.733596 Hz  
 AQ 1.3631488 sec  
 RG 198.55  
 DW 20.800 usec  
 DE 298.2 K  
 TE 298.2 K  
 D1 0.63999999 sec  
 D11 0.03000000 sec  
 TDS 1  
 SFO1 100.6228298 MHz  
 NUC1 13C  
 P1 10.00 usec  
 PL1 48.17399979 W  
 SFO2 400.1316005 MHz  
 NUC2 1H  
 CPOPRG2 waltz16  
 PCPD2 30.00 usec  
 PLM2 13.13999981 W  
 PLM3 0.30142000 W  
 PLM13 0.15161000 W

F2 - Processing parameters  
 SI 32768  
 SF 100.6127460 MHz  
 WDW EM  
 SS 0  
 LB 1.00 Hz  
 GB 0  
 PC 1.40

# Compound 39

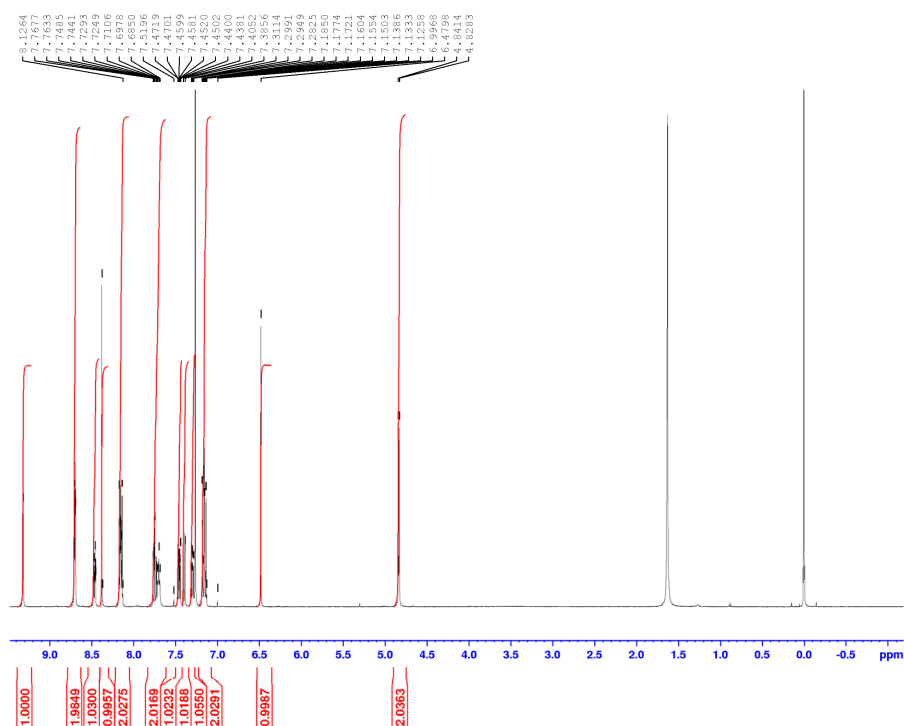

# Compound 41

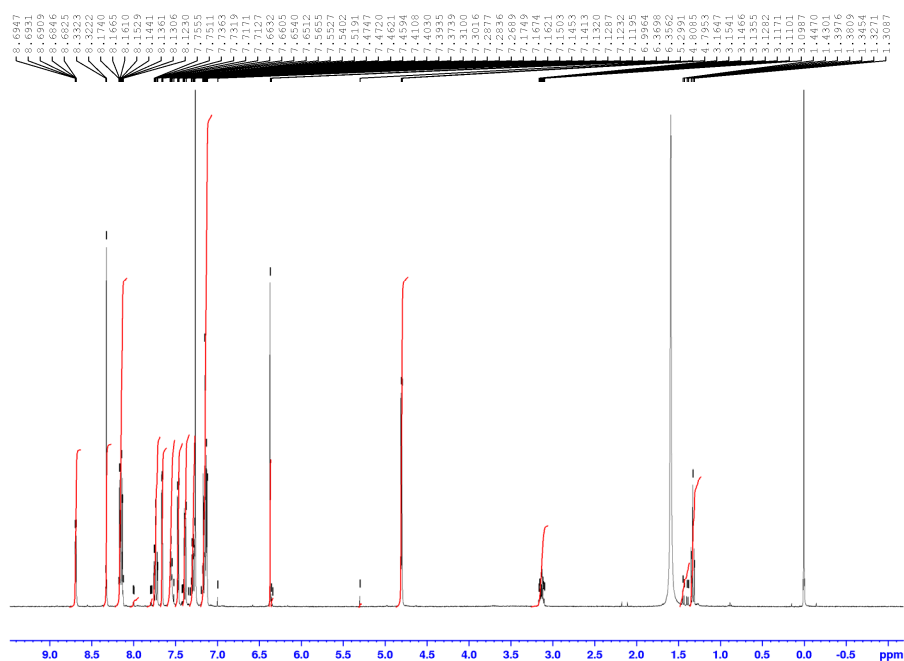

Current Data Parameters  
 NAME Jun29-2017  
 EXPNO 1  
 PROCNO 1

F2 - Acquisition Parameters  
 Date\_ 20170509  
 Time 10:18 h  
 INSTRUM spect  
 PROBRD 2108618\_0860 (1  
 PULPROG zgpg30  
 TD 65536  
 SOLVENT CDCl3  
 NS 64  
 DS 2  
 SWH 8012.420 Hz  
 FIDRES 0.244532 Hz  
 AQ 4.0894465 sec  
 RG 190.50  
 DW 62.400 usec  
 DE 4.10 usec  
 TE 298.0 K  
 D1 1.00000000 sec  
 TDS 1  
 SFO1 400.1324708 MHz  
 NUC1 1H  
 P1 13.60 usec  
 PLW1 13.1999991 W

F2 - Processing parameters  
 SI 65536  
 SF 400.1300092 MHz  
 WDW EM  
 SSB 0  
 LB 0.30 Hz  
 GB 0  
 PC 1.00

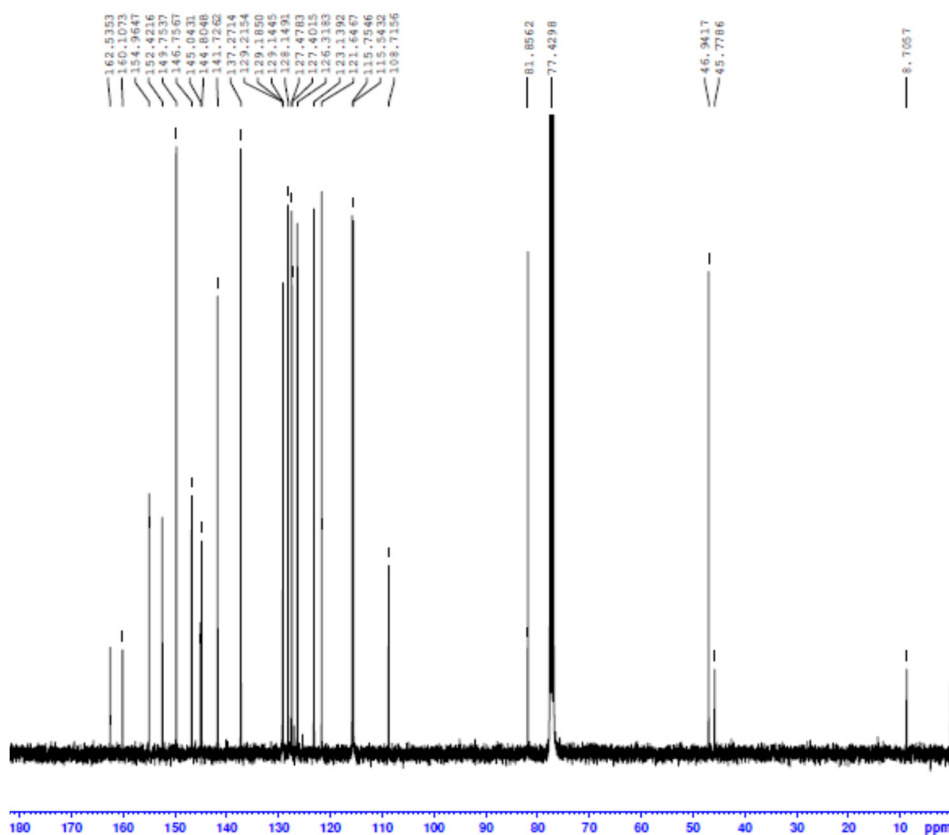

Current Data Parameters  
 NAME Aug12-2022  
 EXPNO 9  
 PROCNO 1

F2 - Acquisition Parameters  
 Date\_ 20220813  
 Time 14:09 h  
 INSTRUM spect  
 PROBRD 2108618\_0860 (1  
 PULPROG zgpg30  
 TD 65536  
 SOLVENT CDCl3  
 NS 10000  
 DS 4  
 SWH 24038.461 Hz  
 FIDRES 0.733596 Hz  
 AQ 1.3611488 sec  
 RG 158.35  
 DW 20.800 usec  
 DE 6.50 usec  
 TE 298.0 K  
 D1 0.63989999 sec  
 D11 0.03000000 sec  
 TDS 1  
 SFO1 100.6228238 MHz  
 NUC1 13C  
 P1 10.00 usec  
 PLW1 48.17399770 W  
 SFO2 400.1316005 MHz  
 NUC2 1H  
 CPDPRG2 wait16  
 PCPD2 90.00 usec  
 PLW2 13.19999981 W  
 PLW12 0.30142000 W  
 PLW13 0.15161000 W

F2 - Processing parameters  
 SI 32768  
 SF 100.6127486 MHz  
 WDW EM  
 SSB 0  
 LB 1.00 Hz  
 GB 0  
 PC 1.40

### Compound 42

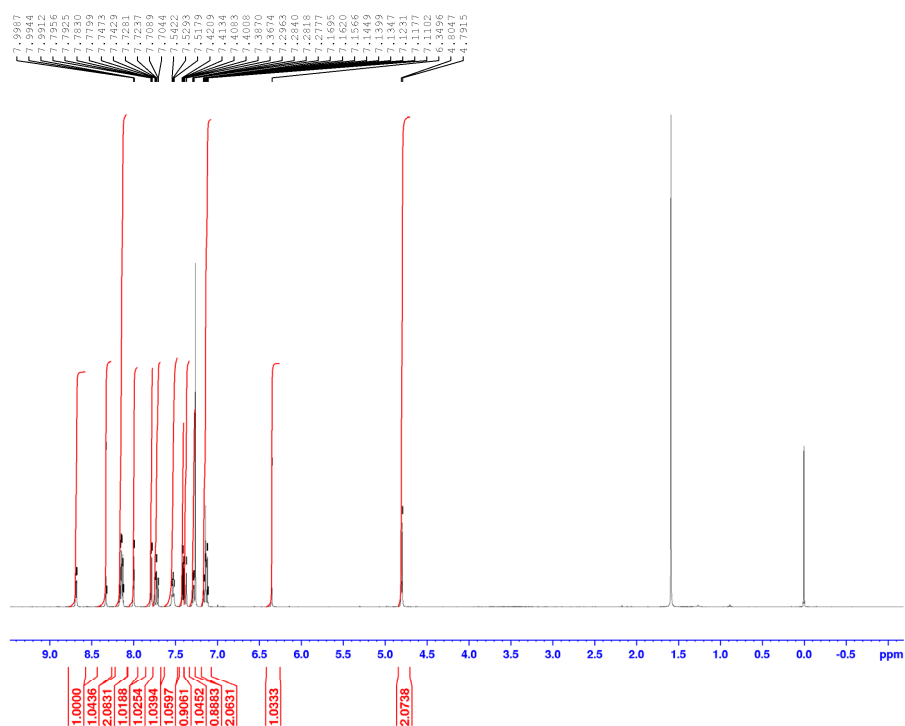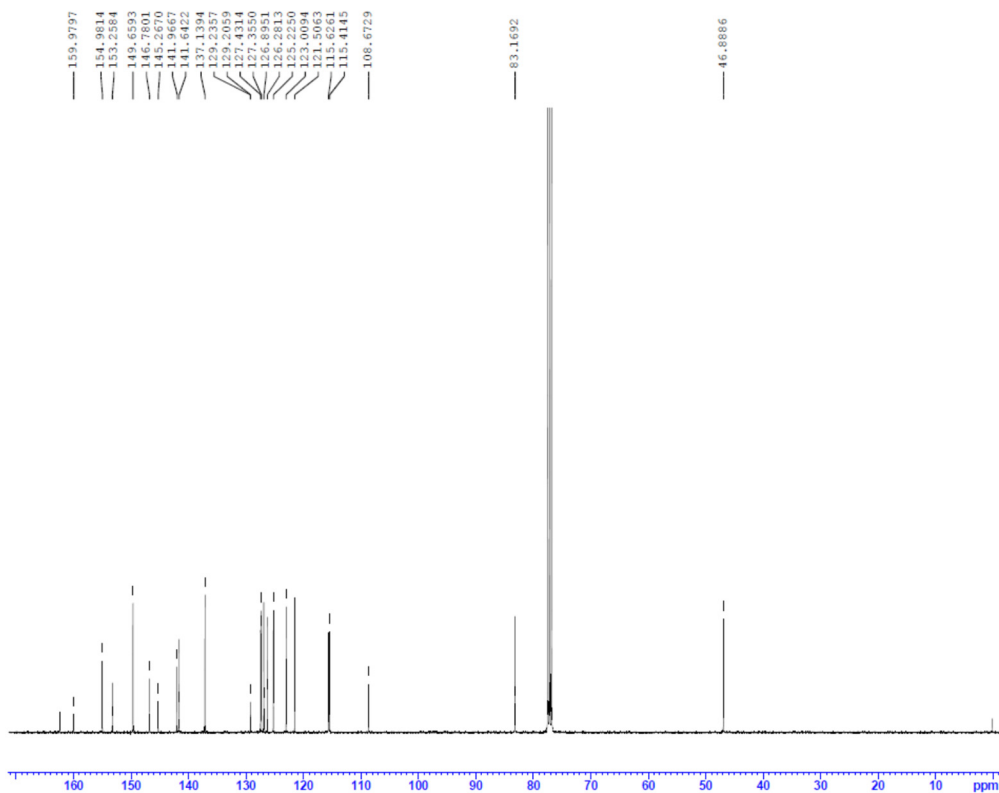



# Compound 44

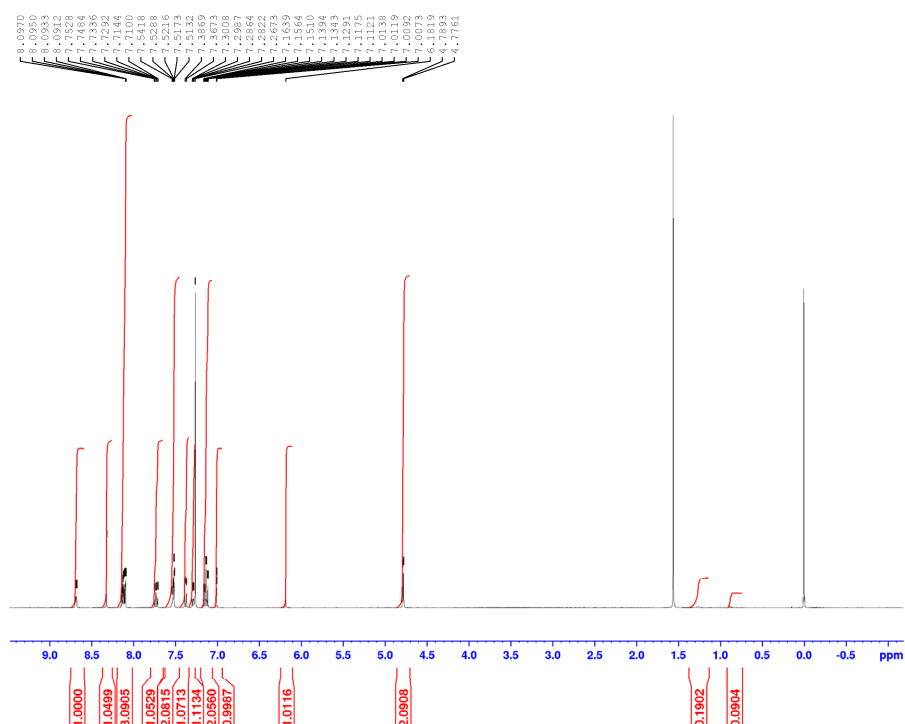

Current Data Parameters  
 NAME Jul13-2017  
 EXPNO 15  
 PROCNO 1

F2 - Acquisition Parameters  
 Date\_ 20170703  
 Time 13:57 h  
 INSTRUM spect  
 PRGMRD Z108618\_0860 (i  
 PULPROG zgpg30  
 TD 65536  
 SOLVENT CDCl3  
 NS 64  
 DS 2  
 FWH 8012.020 Hz  
 FIDRES 0.244532 Hz  
 AQ 4.898465 sec  
 RG 198.55  
 DW 60.400 usec  
 DE 9.70 usec  
 TE 298.0 K  
 D1 1.00000000 sec  
 TDO 0  
 SFO1 400.1324708 MHz  
 NUC1 1H  
 P1 13.60 usec  
 PLW1 13.19999991 W

F2 - Processing parameters  
 SI 60336  
 SF 400.1300593 MHz  
 WDW EM  
 SSB 0  
 LB 0.30 Hz  
 GB 0  
 PC 1.40

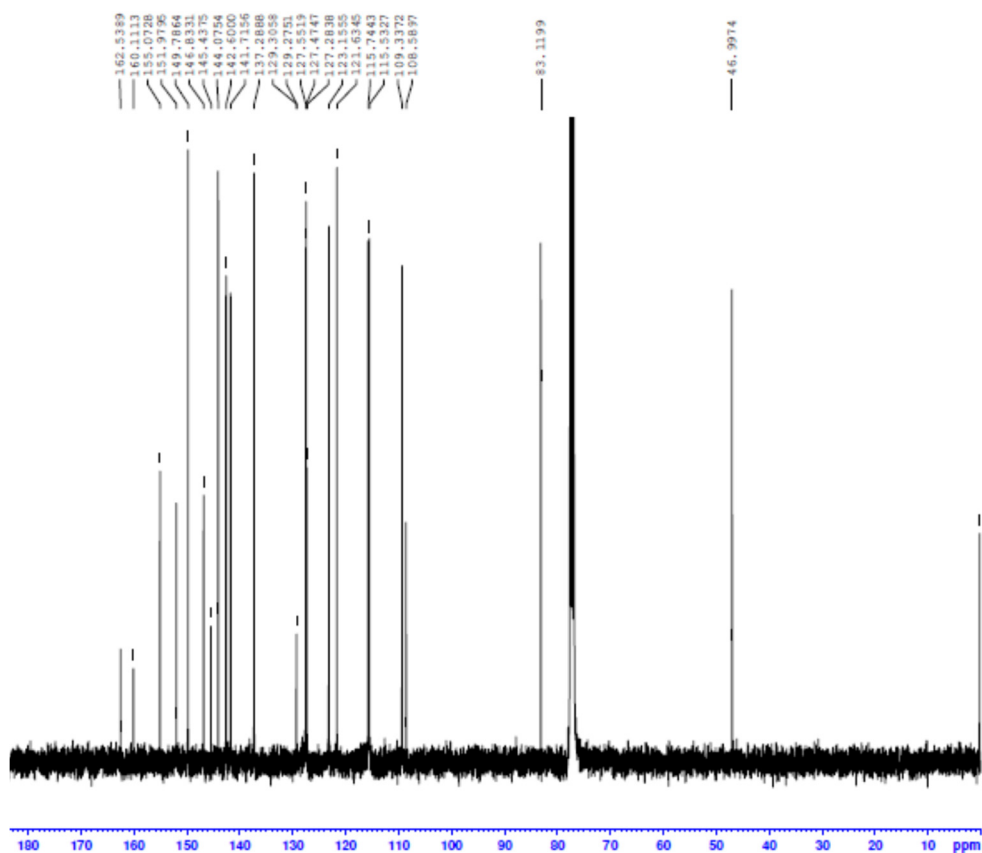

Current Data Parameters  
 NAME Aug29-2022  
 EXPNO 13  
 PROCNO 1

F2 - Acquisition Parameters  
 Date\_ 20220820  
 Time 7:49 h  
 INSTRUM spect  
 PRGMRD Z108618\_0860 (i  
 PULPROG zgpg30  
 TD 65536  
 SOLVENT CDCl3  
 NS 24000  
 DS 4  
 FWH 24038.461 Hz  
 FIDRES 0.733596 Hz  
 AQ 1.3631488 sec  
 RG 198.55  
 DW 20.800 usec  
 DE 6.50 usec  
 TE 298.0 K  
 D1 0.63999999 sec  
 D11 0.03000000 sec  
 TDO 0  
 SFO1 100.6228276 MHz  
 NUC1 13C  
 P1 10.00 usec  
 PLW1 48.17399979 W  
 SFO2 400.1316005 MHz  
 NUC2 1H  
 CPOPRG2 waltz16  
 PCPD12 90.00 usec  
 PLW2 13.19999981 W  
 PLW12 0.30142000 W  
 PLW13 0.15161000 W

F2 - Processing parameters  
 SI 32768  
 SF 100.6127476 MHz  
 WDW EM  
 SSB 0  
 LB 1.00 Hz  
 GB 0  
 PC 1.40

# Compound 52

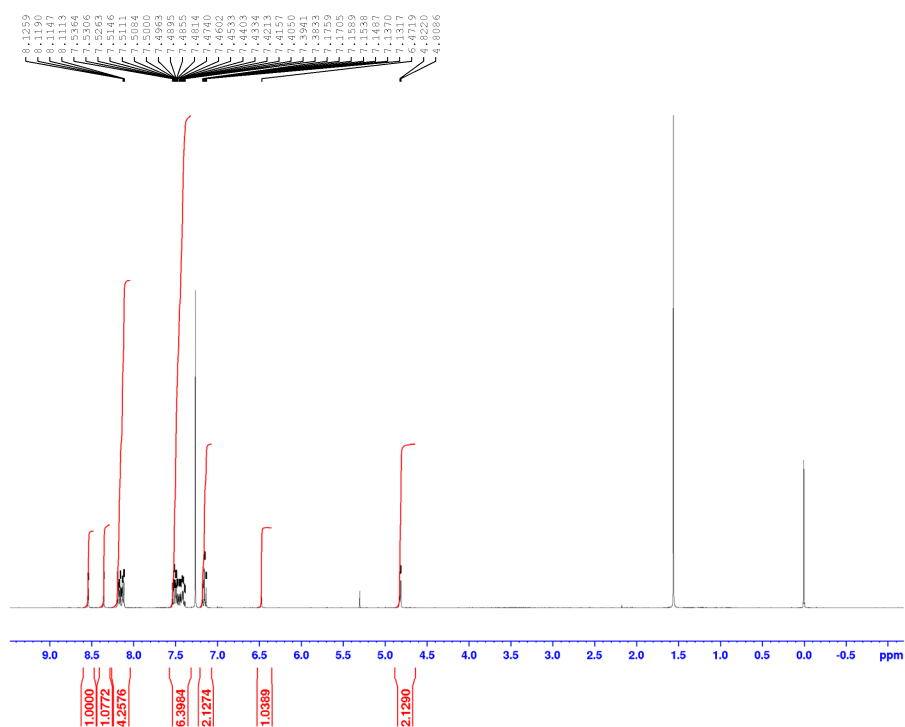

Current Data Parameters  
 NAME Nov17-2016  
 EXPNO 7  
 PROCNO 1  
 F2 - Acquisition Parameters  
 Date\_ 20161117  
 Time 11:47 h  
 INSTRUM spect  
 PRGNAME z108618\_0860  
 PULPROG zgpg30  
 TD 65536  
 SFO1 400.1324708 MHz  
 SOLVENT CDCl3  
 NS 64  
 DS 2  
 SWH 8012.020 Hz  
 FIDRES 0.244532 Hz  
 AQ 4.099465 sec  
 RG 198.55  
 DW 62.400 usec  
 DE 9.70 usec  
 TE 298.0 K  
 D1 1.00000000 sec  
 TDO 1  
 SFO1 400.1324708 MHz  
 NUC1 1H  
 P1 13.60 usec  
 PL1 13.19999991 W  
 F2 - Processing parameters  
 SI 60336  
 SF 400.1300094 MHz  
 WDW DM  
 SSB 0 Hz  
 LB 0.30  
 GB 0  
 PC 1.40

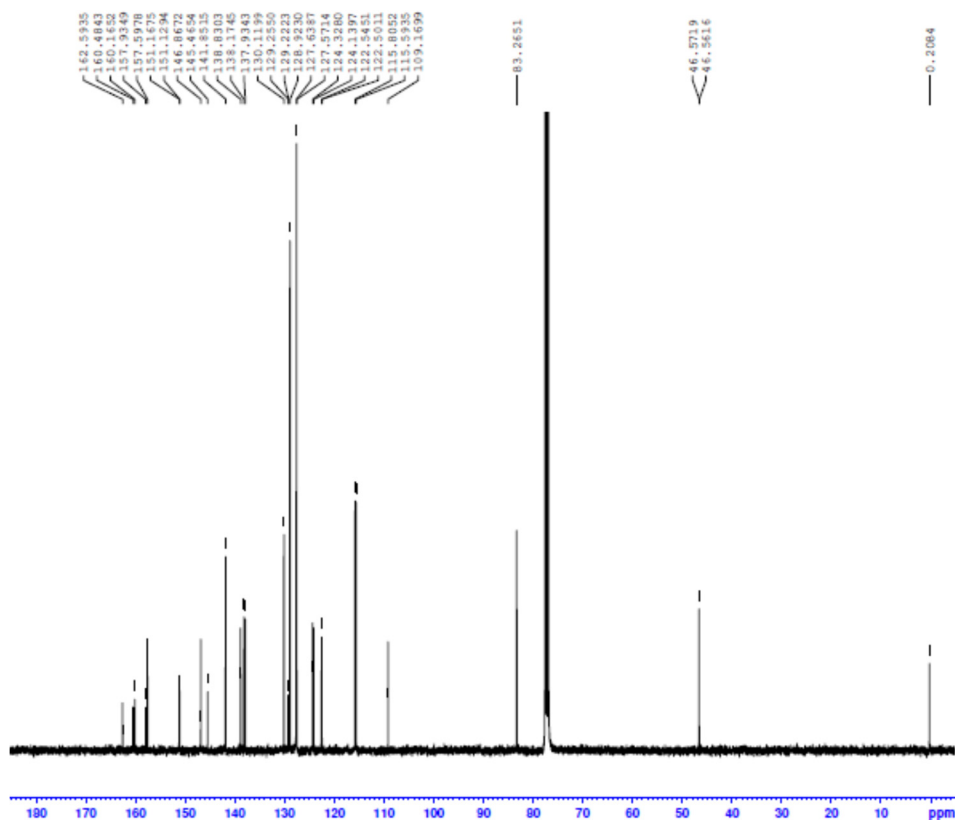

Current Data Parameters  
 NAME Aug10-2022  
 EXPNO 4  
 PROCNO 1  
 F2 - Acquisition Parameters  
 Date\_ 20220811  
 Time 9:32 h  
 INSTRUM spect  
 PRGNAME z108618\_0860  
 PULPROG zgpg30  
 TD 65536  
 SFO1 100.6228298 MHz  
 SOLVENT CDCl3  
 NS 20000  
 DS 4  
 SWH 24038.461 Hz  
 FIDRES 0.733596 Hz  
 AQ 1.351488 sec  
 RG 198.55  
 DW 20.800 usec  
 DE 6.50 usec  
 TE 298.0 K  
 D1 0.63999999 sec  
 D11 0.03000000 sec  
 TDO 1  
 SFO1 100.6228298 MHz  
 NUC1 13C  
 P1 10.00 usec  
 PL1 48.17399979 W  
 SFO2 400.1316005 MHz  
 NUC2 1H  
 PCP2PRG2 wait16  
 SFO2 400.1316005 MHz  
 PL2 13.19999991 W  
 SFO3 0.30142000 MHz  
 PL3 0.13161000 W  
 F2 - Processing parameters  
 SI 32768  
 SF 100.6127479 MHz  
 WDW EM  
 SSB 0 Hz  
 LB 1.00 Hz  
 GB 0  
 PC 1.40

# Compound 53

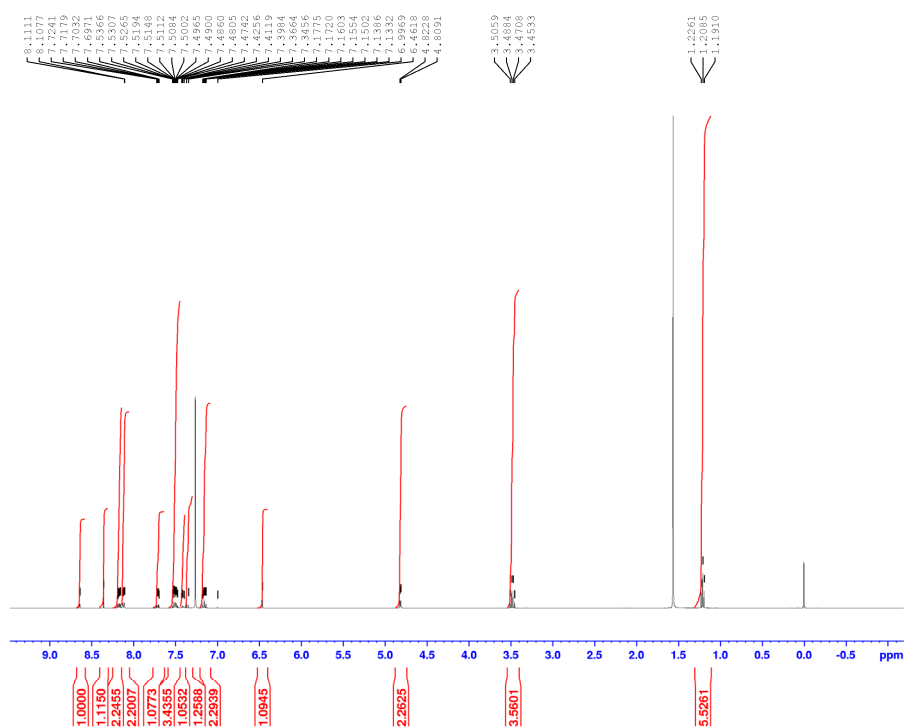

Current Data Parameters  
 NAME Nov16-2016  
 EXPNO 1  
 PROCNO 1  
 F2 - Acquisition Parameters  
 Date\_ 20161116  
 Time 12.04 h  
 INSTRUM spect  
 PULPROG zgpg30  
 TO 65536  
 SOLVENT CDCl3  
 NS 64  
 DS 2  
 SWH 8012.620 Hz  
 FIDRES 0.244532 Hz  
 AQ 4.0094605 sec  
 RG 196.55  
 DW 62.400 usec  
 DE 6.50 usec  
 TE 298.0 K  
 D1 1.00000000 sec  
 TDO 1  
 SFO1 400.1324708 MHz  
 NUC1 1H  
 P1 13.40 usec  
 PLW1 13.19999981 W  
 F2 - Processing parameters  
 SI 400.14  
 SF 400.1300000 MHz  
 WDW EM  
 SSB 0  
 LB 0.30 Hz  
 GB 0  
 PC 1.00

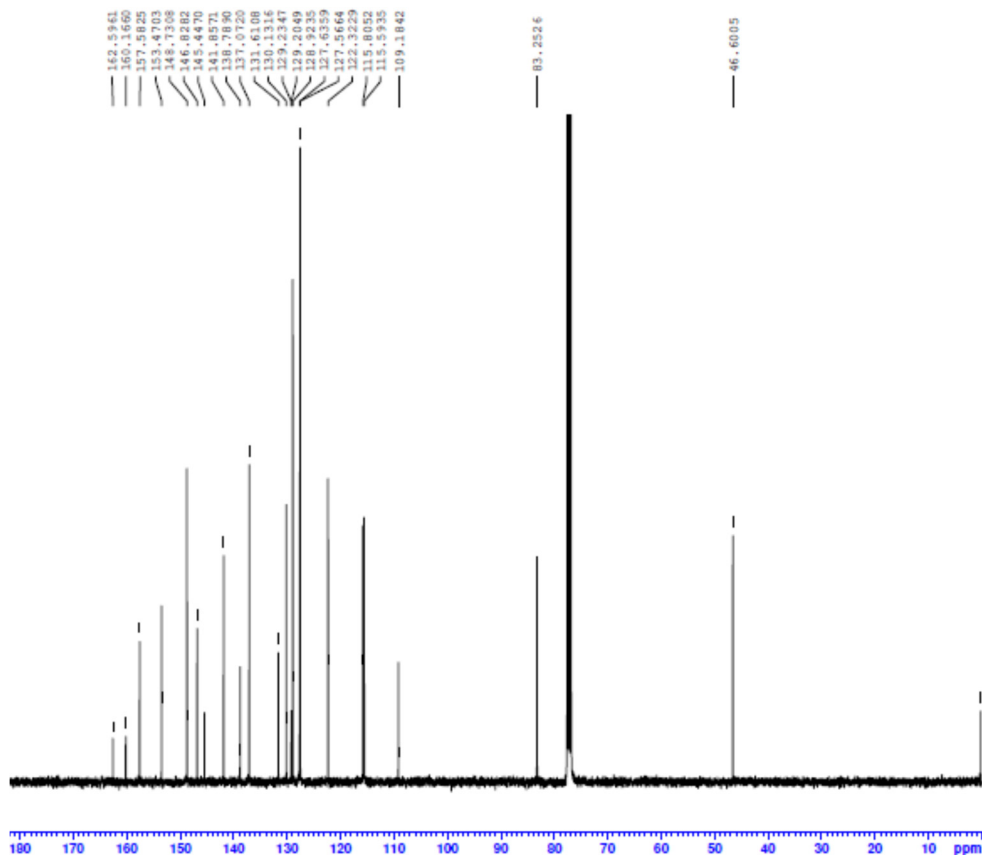

Current Data Parameters  
 NAME Aug22-2022  
 EXPNO 12  
 PROCNO 1  
 F2 - Acquisition Parameters  
 Date\_ 20220823  
 Time 1.37 h  
 INSTRUM spect  
 PULPROG zgpg30  
 TO 65536  
 SOLVENT CDCl3  
 NS 13000  
 DS 4  
 SWH 24038.461 Hz  
 FIDRES 0.733596 Hz  
 AQ 1.3631488 sec  
 RG 196.55  
 DW 20.800 usec  
 DE 6.50 usec  
 TE 298.0 K  
 D1 0.63999999 sec  
 D11 0.03000000 sec  
 TDO 1  
 SFO1 100.6228298 MHz  
 NUC1 13C  
 P1 10.00 usec  
 PLW1 48.1739979 W  
 SFO2 400.1316005 MHz  
 NUC2 1H  
 CPDPRG2 waltz16  
 PCPD2 90.00 usec  
 PLW2 13.19999981 W  
 PLW12 0.35142000 W  
 PLW13 0.15161000 W  
 F2 - Processing parameters  
 SI 100.61  
 SF 100.6127480 MHz  
 WDW EM  
 SSB 0  
 LB 1.00 Hz  
 GB 0  
 PC 1.40

<sup>1</sup>H NMR spectrum (CDCl<sub>3</sub>) of compound 10a. The x-axis represents the chemical shift in ppm, ranging from 0.0 to 9.0. The spectrum shows several peaks, with integration values indicated above them.

Chemical shift values (ppm): 9.1465, 9.1374, 8.1299, 8.1259, 8.1259, 8.1257, 7.6262, 7.6300, 7.5256, 7.5192, 7.5185, 7.4981, 7.4899, 7.4859, 7.4850, 7.4849, 7.4699, 7.4159, 7.4025, 7.4025, 7.3248, 7.3248, 7.3034, 7.2486, 7.2486, 7.2474, 7.2474, 7.2199, 7.1727, 7.1674, 7.1674, 7.1507, 7.1456, 7.1338, 7.1338, 6.1265, 6.1265, 4.7733, 4.7599, 3.8819, 3.5058, 3.4883, 3.4708, 3.4553, 1.2261, 1.2086, 1.1911.

```

Name      Data      Parameters
-----
CURRENT   Dec21-2016
EXPNO     19
PROCNO    1

F2 - Acquisition Parameters
-----
Date_     20161221
Time      15:47 h
INSTRUM   spect
PROCNO    2106010_0962
PULPROG   zgpg30
TD         65536
DO         2330
TO SOLVENT CDCL3
NS         64
DS         2
SWH        8012.020 Hz
FIDRES     0.2454532 Hz
AQ         4.4389465 sec
RG          198.55
DE         62.400 usec
TE         6.50 usec
UE         298.0 K
TE2        1.00000000 sec
TD0         1
SF01       400.132470 MHz
NC1        1H
PC1         13.60 usec
PL1        13.19999991 W
PL2

F2 - Processing parameters
-----
SI         65536
SF          400.1300091 MHz
WDW        EM
SSB         0
GB          0.30 Hz
CB          0
PC          1.00

```

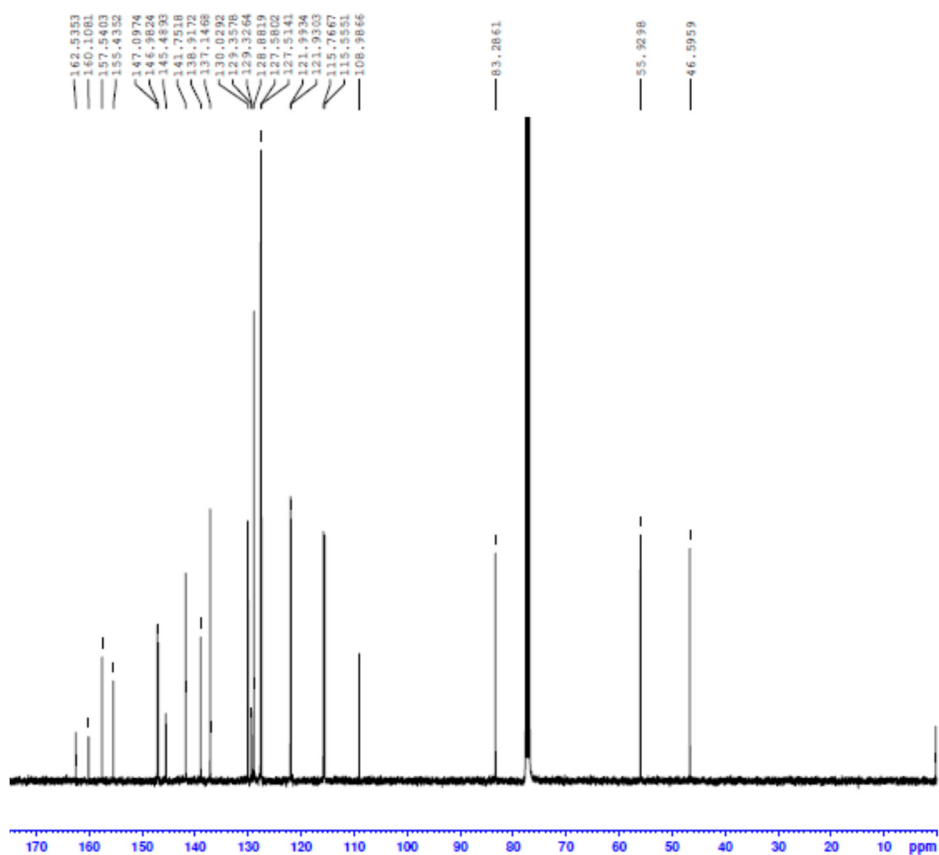

```

Current Data Parameters
NAME      Aug22-2022
EXPNO     14
PROCNO    1
-----
P2 - Acquisition Parameters
Date_      20220223
Time       8.05 h
INSTRUM    spect
PROBHD     ZN04610.04610
PULPROG    zgpg30
TD         65536
SFOFREQ    CQC13
RG          32.00000000
DS         4
SS         2
FIDRES     2403.64 Hz
AQ         0.735594 sec
RG         1.3631448 sec
AQ         193.999999 sec
TE         29.80000000
DE         0.039999999
D1         0.020000000
D2         1
D3         1
SFO1       100.6222999 MHz
NUC1        13
P1         10.00000000
P2         10.00000000
P3         48.13999999 MHz
NUC2         1
P4         100.6136000 MHz
NUC3         1
P5         10.00000000
PCPD2       1
PCPD3       1
PCPD4       1
PCPD5       1
PCPD6       1
PCPD7       1
PCPD8       1
PCPD9       1
PCPD10      1
PCPD11      1
PCPD12      1
PCPD13      1
PCPD14      1
PCPD15      1
PCPD16      1
PCPD17      1
PCPD18      1
PCPD19      1
PCPD20      1
PCPD21      1
PCPD22      1
PCPD23      1
PCPD24      1
PCPD25      1
PCPD26      1
PCPD27      1
PCPD28      1
PCPD29      1
PCPD30      1
PCPD31      1
PCPD32      1
PCPD33      1
PCPD34      1
PCPD35      1
PCPD36      1
PCPD37      1
PCPD38      1
PCPD39      1
PCPD40      1
PCPD41      1
PCPD42      1
PCPD43      1
PCPD44      1
PCPD45      1
PCPD46      1
PCPD47      1
PCPD48      1
PCPD49      1
PCPD50      1
PCPD51      1
PCPD52      1
PCPD53      1
PCPD54      1
PCPD55      1
PCPD56      1
PCPD57      1
PCPD58      1
PCPD59      1
PCPD60      1
PCPD61      1
PCPD62      1
PCPD63      1
PCPD64      1
PCPD65      1
PCPD66      1
PCPD67      1
PCPD68      1
PCPD69      1
PCPD70      1
PCPD71      1
PCPD72      1
PCPD73      1
PCPD74      1
PCPD75      1
PCPD76      1
PCPD77      1
PCPD78      1
PCPD79      1
PCPD80      1
PCPD81      1
PCPD82      1
PCPD83      1
PCPD84      1
PCPD85      1
PCPD86      1
PCPD87      1
PCPD88      1
PCPD89      1
PCPD90      1
PCPD91      1
PCPD92      1
PCPD93      1
PCPD94      1
PCPD95      1
PCPD96      1
PCPD97      1
PCPD98      1
PCPD99      1
PCPD100     1
PCPD101     1
PCPD102     1
PCPD103     1
PCPD104     1
PCPD105     1
PCPD106     1
PCPD107     1
PCPD108     1
PCPD109     1
PCPD110     1
PCPD111     1
PCPD112     1
PCPD113     1
PCPD114     1
PCPD115     1
PCPD116     1
PCPD117     1
PCPD118     1
PCPD119     1
PCPD120     1
PCPD121     1
PCPD122     1
PCPD123     1
PCPD124     1
PCPD125     1
PCPD126     1
PCPD127     1
PCPD128     1
PCPD129     1
PCPD130     1
PCPD131     1
PCPD132     1
PCPD133     1
PCPD134     1
PCPD135     1
PCPD136     1
PCPD137     1
PCPD138     1
PCPD139     1
PCPD140     1
PCPD141     1
PCPD142     1
PCPD143     1
PCPD144     1
PCPD145     1
PCPD146     1
PCPD147     1
PCPD148     1
PCPD149     1
PCPD150     1
PCPD151     1
PCPD152     1
PCPD153     1
PCPD154     1
PCPD155     1
PCPD156     1
PCPD157     1
PCPD158     1
PCPD159     1
PCPD160     1
PCPD161     1
PCPD162     1
PCPD163     1
PCPD164     1
PCPD165     1
PCPD166     1
PCPD167     1
PCPD168     1
PCPD169     1
PCPD170     1
PCPD171     1
PCPD172     1
PCPD173     1
PCPD174     1
PCPD175     1
PCPD176     1
PCPD177     1
PCPD178     1
PCPD179     1
PCPD180     1
PCPD181     1
PCPD182     1
PCPD183     1
PCPD184     1
PCPD185     1
PCPD186     1
PCPD187     1
PCPD188     1
PCPD189     1
PCPD190     1
PCPD191     1
PCPD192     1
PCPD193     1
PCPD194     1
PCPD195     1
PCPD196     1
PCPD197     1
PCPD198     1
PCPD199     1
PCPD200     1
PCPD201     1
PCPD202     1
PCPD203     1
PCPD204     1
PCPD205     1
PCPD206     1
PCPD207     1
PCPD208     1
PCPD209     1
PCPD210     1
PCPD211     1
PCPD212     1
PCPD213     1
PCPD214     1
PCPD215     1
PCPD216     1
PCPD217     1
PCPD218     1
PCPD219     1
PCPD220     1
PCPD221     1
PCPD222     1
PCPD223     1
PCPD224     1
PCPD225     1
PCPD226     1
PCPD227     1
PCPD228     1
PCPD229     1
PCPD230     1
PCPD231     1
PCPD232     1
PCPD233     1
PCPD234     1
PCPD235     1
PCPD236     1
PCPD237     1
PCPD238     1
PCPD239     1
PCPD240     1
PCPD241     1
PCPD242     1
PCPD243     1
PCPD244     1
PCPD245     1
PCPD246     1
PCPD247     1
PCPD248     1
PCPD249     1
PCPD250     1
PCPD251     1
PCPD252     1
PCPD253     1
PCPD254     1
PCPD255     1
PCPD256     1
PCPD257     1
PCPD258     1
PCPD259     1
PCPD260     1
PCPD261     1
PCPD262     1
PCPD263     1
PCPD264     1
PCPD265     1
PCPD266     1
PCPD267     1
PCPD268     1
PCPD269     1
PCPD270     1
PCPD271     1
PCPD272     1
PCPD273     1
PCPD274     1
PCPD275     1
PCPD276     1
PCPD277     1
PCPD278     1
PCPD279     1
PCPD280     1
PCPD281     1
PCPD282     1
PCPD283     1
PCPD284     1
PCPD285     1
PCPD286     1
PCPD287     1
PCPD288     1
PCPD289     1
PCPD290     1
PCPD291     1
PCPD292     1
PCPD293     1
PCPD294     1
PCPD295     1
PCPD296     1
PCPD297     1
PCPD298     1
PCPD299     1
PCPD300     1
PCPD301     1
PCPD302     1
PCPD303     1
PCPD304     1
PCPD305     1
PCPD306     1
PCPD307     1
PCPD308     1
PCPD309     1
PCPD310     1
PCPD311     1
PCPD312     1
PCPD313     1
PCPD314     1
PCPD315     1
PCPD316     1
PCPD317     1
PCPD318     1
PCPD319     1
PCPD320     1
PCPD321     1
PCPD322     1
PCPD323     1
PCPD324     1
PCPD325     1
PCPD326     1
PCPD327     1
PCPD328     1
PCPD329     1
PCPD330     1
PCPD331     1
PCPD332     1
PCPD333     1
PCPD334     1
PCPD335     1
PCPD336     1
PCPD337     1
PCPD338     1
PCPD339     1
PCPD340     1
PCPD341     1
PCPD342     1
PCPD343     1
PCPD344     1
PCPD345     1
PCPD346     1
PCPD347     1
PCPD348     1
PCPD349     1
PCPD350     1
PCPD351     1
PCPD352     1
PCPD353     1
PCPD354     1
PCPD355     1
PCPD356     1
PCPD357     1
PCPD358     1
PCPD359     1
PCPD360     1
PCPD361     1
PCPD362     1
PCPD363     1
PCPD364     1
PCPD365     1
PCPD366     1
PCPD367     1
PCPD368     1
PCPD369     1
PCPD370     1
PCPD371     1
PCPD372     1
PCPD373     1
PCPD374     1
PCPD375     1
PCPD376     1
PCPD377     1
PCPD378     1
PCPD379     1
PCPD380     1
PCPD381     1
PCPD382     1
PCPD383     1
PCPD384     1
PCPD385     1
PCPD386     1
PCPD387     1
PCPD388     1
PCPD389     1
PCPD390     1
PCPD391     1
PCPD392     1
PCPD393     1
PCPD394     1
PCPD395     1
PCPD396     1
PCPD397     1
PCPD398     1
PCPD399     1
PCPD400     1
PCPD401     1
PCPD402     1
PCPD403     1
PCPD404     1
PCPD405     1
PCPD406     1
PCPD407     1
PCPD408     1
PCPD409     1
PCPD410     1
PCPD411     1
PCPD412     1
PCPD413     1
PCPD414     1
PCPD415     1
PCPD416     1
PCPD417     1
PCPD418     1
PCPD419     1
PCPD420     1
PCPD421     1
PCPD422     1
PCPD423     1
PCPD424     1
PCPD425     1
PCPD426     1
PCPD
```

# Compound 55

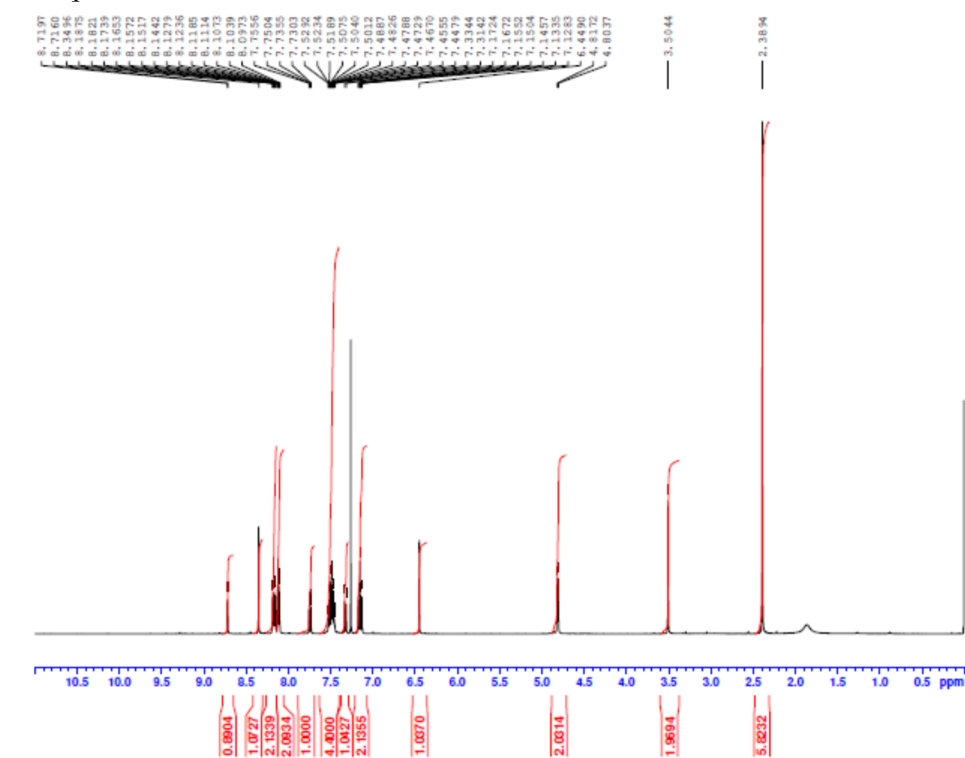

Current Data Parameters  
 NAME Aug10-2022  
 EXPNO 7  
 PROCNO 1  
 F2 - Acquisition Parameters  
 Date\_ 20220831  
 Time 14.52 h  
 INSTRUM spect  
 PROBRD Z100618\_0560 (i  
 PULPROG zgpg30  
 TD 65536  
 SFO 400.1324708 MHz  
 SOLVENT CDCl3  
 NS 64  
 DS 4  
 SWH 8012.820 Hz  
 FIDRES 0.244532 Hz  
 AQ 4.303443 sec  
 RG 198.55  
 WC 62.400 umsec  
 DE 6.50 umsec  
 TE 298.2 K  
 D1 1.00000000 sec  
 D11 0.03000000 sec  
 SFO1 400.1324708 MHz  
 NUC1 13  
 P1 4.13 umsec  
 P2 13.50 umsec  
 P3 13.19999991 W  
 F2 - Processing parameters  
 SI 65536  
 SF 400.1324708 MHz  
 WCN 0  
 SGB 0  
 LB 0.30 Hz  
 GB 0  
 PC 1.00

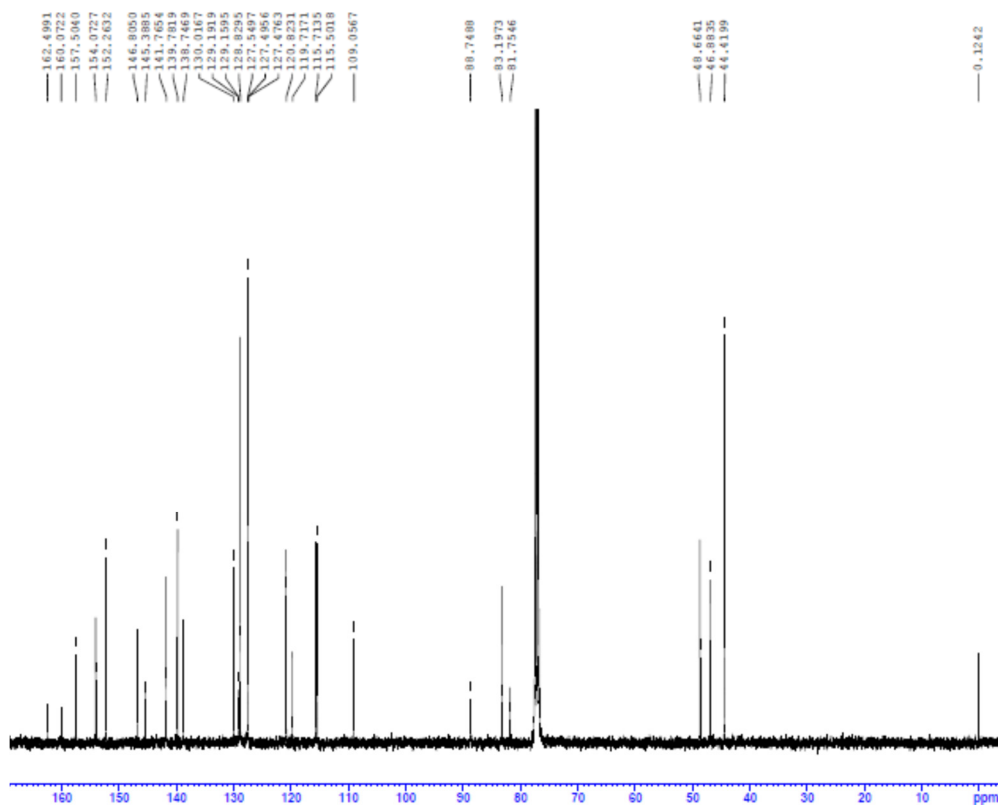

Current Data Parameters  
 NAME Aug10-2022  
 EXPNO 8  
 PROCNO 1  
 F2 - Acquisition Parameters  
 Date\_ 20220831  
 Time 2.05 h  
 INSTRUM spect  
 PROBRD Z100618\_0560 (i  
 PULPROG zgpg30  
 TD 65536  
 SFO 400.1324708 MHz  
 SOLVENT CDCl3  
 NS 14000  
 DS 4  
 SWH 24038.462 Hz  
 FIDRES 0.733596 Hz  
 AQ 1.9431488 sec  
 RG 198.55  
 WC 20.800 umsec  
 DE 6.50 umsec  
 TE 298.2 K  
 D1 0.03000000 sec  
 D11 0.03000000 sec  
 SFO1 400.1324708 MHz  
 NUC1 13  
 P1 10.00 umsec  
 P2 40.17599979 W  
 SFO2 400.13140000 MHz  
 NUC2 1H  
 P3 13.19999991 W  
 P4 0.15161000 W  
 F2 - Processing parameters  
 SI 32768  
 SF 400.1324708 MHz  
 WCN 0  
 SGB 0  
 LB 1.00 Hz  
 GB 0  
 PC 1.40

# Compound 62

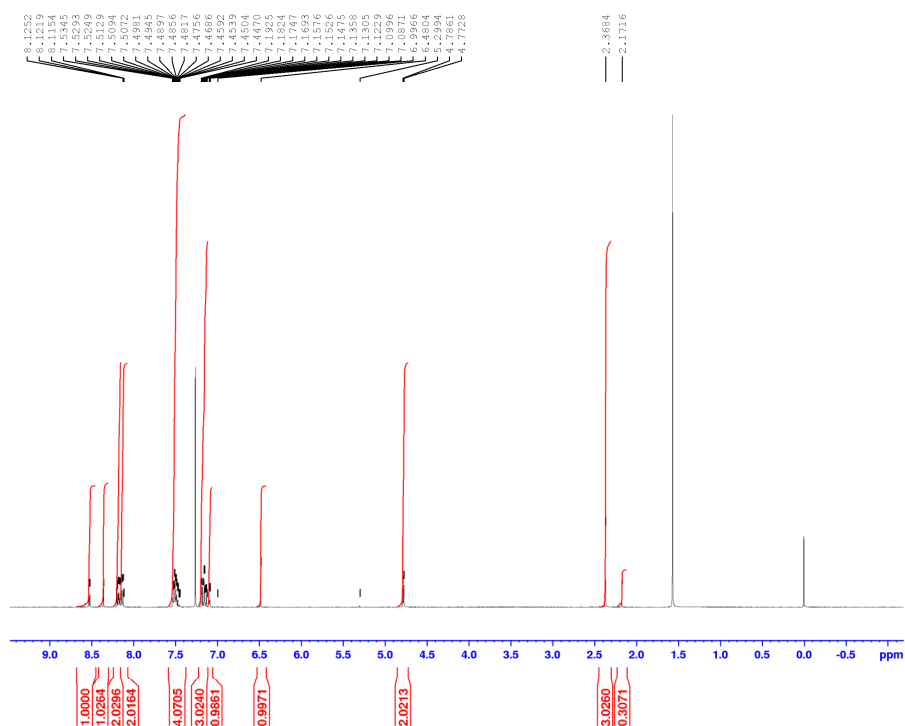

# Compound 63

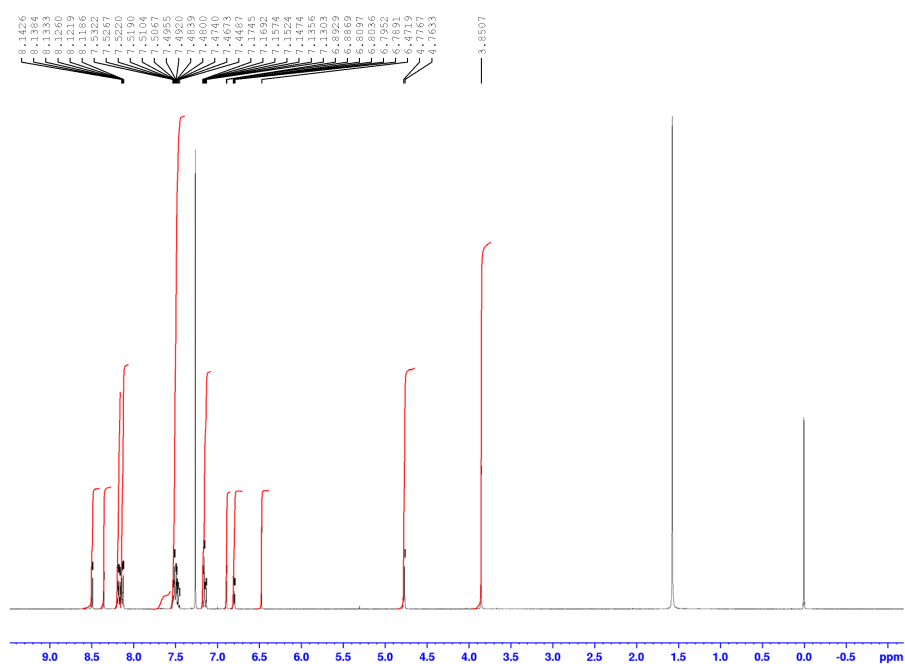

Current Data Parameters  
 NAME Dec19-2016  
 EXPNO 14  
 PROCNO 1

F2 - Acquisition Parameters  
 Date\_ 20161226  
 Time 15:11  
 INSTRUM spect  
 PROBRD z100618\_0860  
 PULPROG zg30  
 TD 65536  
 SOLVENT CDCl3  
 NS 64  
 DS 2  
 SWH 8012.820 Hz  
 FIDRES 0.244532 Hz  
 AQ 4.0034165 sec  
 RG 198.55  
 DW 62.400 usec  
 DE 4.50 usec  
 TE 298.0 K  
 D1 1.40000000 sec  
 TDO 1  
 SFO1 400.1324700 MHz  
 NUC1 1H  
 P1 13.60 usec  
 PL1 13.19999991 W

F2 - Processing parameters  
 SI 65536  
 SF 400.1324700 MHz  
 WDW EM  
 GB 0  
 LB 0.30 Hz  
 GB 0  
 PC 1.00

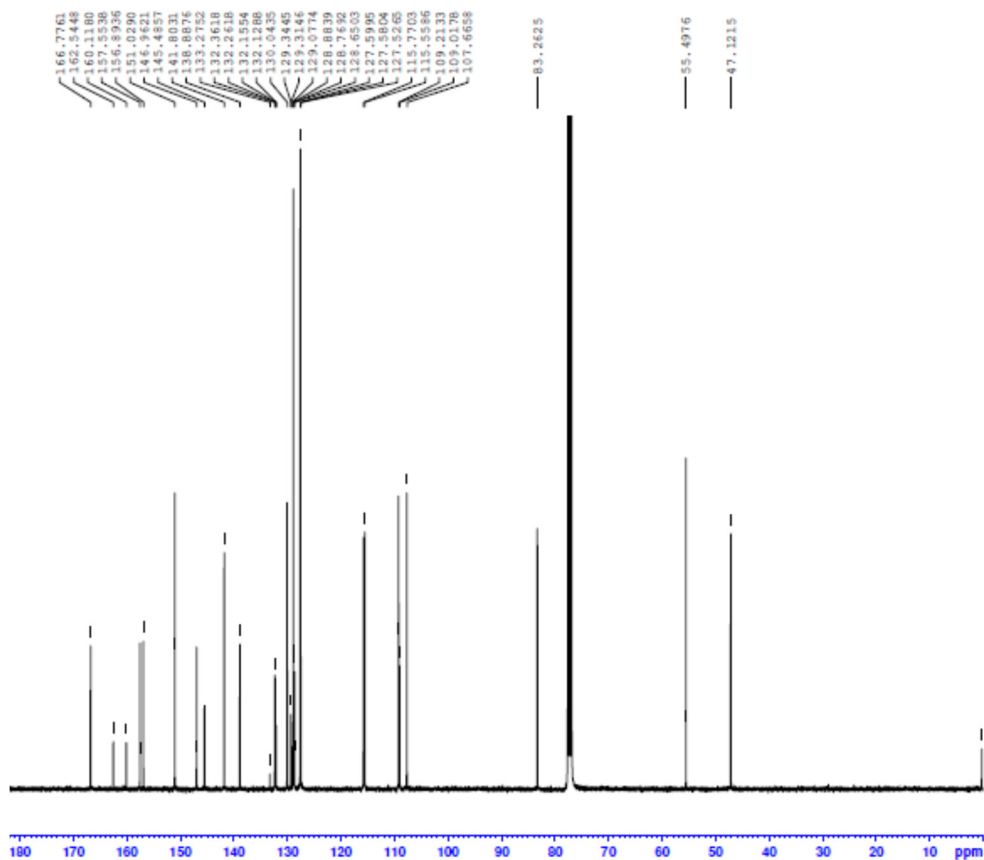

Current Data Parameters  
 NAME Aug16-2022  
 EXPNO 2  
 PROCNO 1

F2 - Acquisition Parameters  
 Date\_ 20220826  
 Time 0:35 h  
 INSTRUM spect  
 PROBRD z100618\_0860  
 PULPROG zgpg30  
 TD 65536  
 SOLVENT CDCl3  
 NS 32000  
 DS 4  
 SWH 24038.461 Hz  
 FIDRES 0.733596 Hz  
 AQ 1.3631468 sec  
 RG 198.55  
 DW 20.800 usec  
 DE 6.50 usec  
 TE 298.0 K  
 D1 0.639999999 sec  
 D11 0.030000000 sec  
 TDO 0  
 SFO1 100.6228298 MHz  
 NUC1 13C  
 P1 10.00 usec  
 PL1 48.173999775 W  
 SFO2 400.1316000 MHz  
 NUC2 1H  
 PCPORG2 waltz16  
 PCPD2 90.00 usec  
 PLW2 13.199999901 W  
 PLW12 0.30142000 W  
 PLW13 0.15161000 W

F2 - Processing parameters  
 SI 32768  
 SF 100.6127487 MHz  
 WDW EM  
 GB 0  
 LB 1.00 Hz  
 GB 0  
 PC 1.40

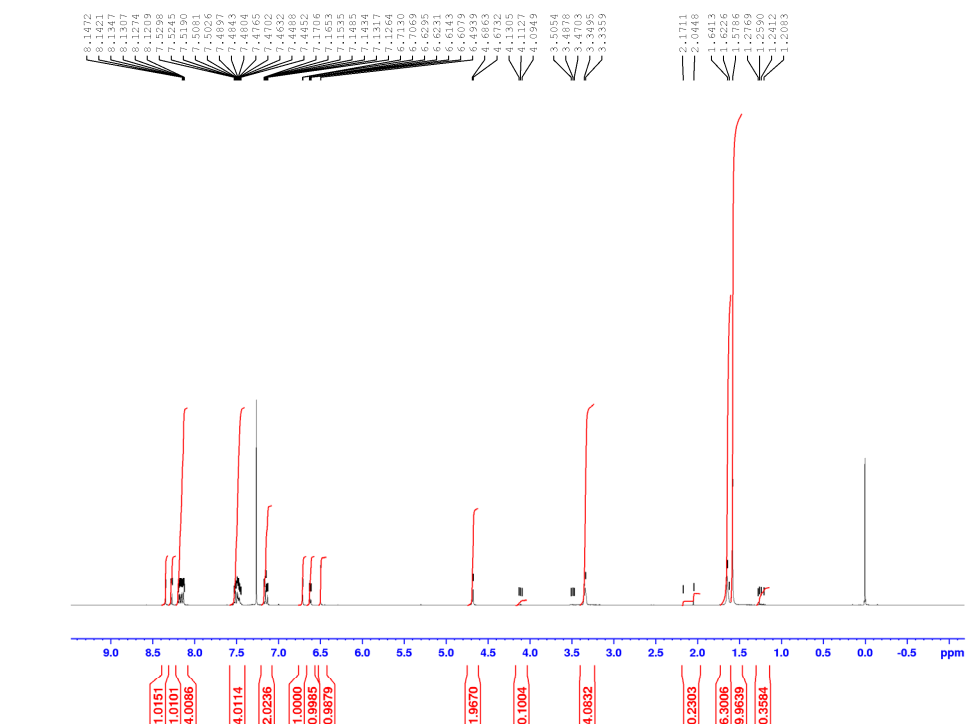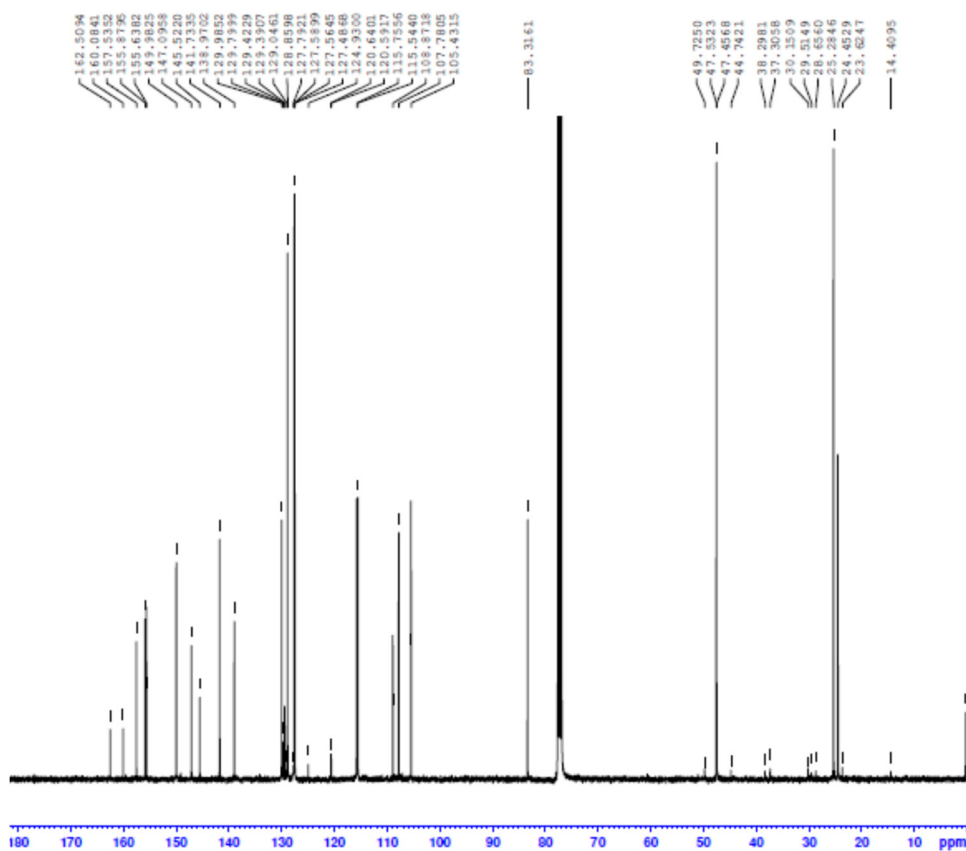

Supplement: s1 [file s1]
